# Tumor Microenvironment Alters Chemoresistance of Hepatocellular Carcinoma Through CYP3A4 Metabolic Activity

Alican Özkan<sup>1,11\*</sup>, Danielle L. Stolley<sup>2</sup>, Erik N. K. Cressman<sup>3</sup>, Matthew McMillin<sup>4,5</sup>, Sharon DeMorrow<sup>4,5,6</sup>, Thomas E. Yankeelov<sup>2,7,8,9,10</sup>, Marissa Nichole Rylander<sup>1,2,7</sup>

<sup>1</sup> Department of Mechanical Engineering, The University of Texas, Austin, TX, 78712, United States

<sup>2</sup> Department of Biomedical Engineering, The University of Texas, Austin, TX, 78712, United States

<sup>3</sup> Department of Interventional Radiology, The University of Texas MD Anderson Cancer Center, Houston, TX, 77030. United States

<sup>4</sup> Department of Internal Medicine, Dell Medical School, The University of Texas at Austin, Austin, TX, United States

<sup>5</sup> Central Texas Veterans Health Care System, Temple, TX, United States

<sup>6</sup> Division of Pharmacology and Toxicology, College of Pharmacy, The University of Texas at Austin, Austin, TX 78712, United States

<sup>7</sup> Oden Institute for Computational Engineering and Sciences, The University of Texas, Austin, TX, 78712, United States

<sup>8</sup> Departments of Diagnostic Medicine, The University of Texas, Austin, TX, 78712, United States

<sup>9</sup> Department of Oncology, The University of Texas, Austin, TX, 78712, United States

<sup>10</sup> Livestrong Cancer Institutes, Dell Medical School, The University of Texas, Austin, TX, 78712, United States

<sup>11</sup> Current address: Wyss Institute for Biologically Inspired Engineering at Harvard University, Boston, MA, 02115, United States.

\* **Correspondence:** Alican Özkan, [alican.ozkan@wyss.harvard.edu](mailto:alican.ozkan@wyss.harvard.edu)

**Keywords:** Hepatocellular Carcinoma, Cirrhosis, Desmoplasia, Chemoresistance, Hypoxia, 3D cell culture, CYP Metabolism, Tissue Engineering, Drug Metabolization

## Abstract

Variations in tumor biology from patient to patient combined with the low overall survival rate of hepatocellular carcinoma (HCC) present significant clinical challenges. During the progression of chronic liver diseases from inflammation to the development of HCC, microenvironmental properties, including tissue stiffness and oxygen concentration, change over time. This can potentially impact drug metabolism and subsequent therapy response to commonly utilized therapeutics, such as doxorubicin, multi-kinase inhibitors (e.g., sorafenib), and other drugs, including immunotherapies. In this study, we utilized four common HCC cell lines embedded in 3D collagen type-I gels of varying stiffnesses to mimic normal and cirrhotic livers with environmental oxygen regulation to quantify the impact of these microenvironmental factors on HCC chemoresistance. In general, we found that HCC cells with higher baseline levels of cytochrome p450-3A4 (CYP3A4) enzyme expression, HepG2 and C3Asub28, exhibited a cirrhosis-dependent increase in doxorubicin chemoresistance. Under the same conditions, HCC cell lines with lower CYP3A4 expression, HuH-7 and Hep3B2, showed a decrease in doxorubicin chemoresistance in response to an increase in microenvironmental stiffness. This differential therapeutic response was correlated with the regulation of CYP3A4 expression levels under the influence of stiffness and oxygen variation. In all tested HCC cell lines, the addition of sorafenib lowered the required doxorubicin dose to induce significant levels of cell death, demonstrating its potential to help reduce systemic doxorubicin toxicity when used in combination. These results suggest

44 that patient-specific tumor microenvironmental factors, including tissue stiffness, hypoxia, and  
45 CYP3A4 activity levels, may need to be considered for more effective use of chemotherapeutics in  
46 HCC patients.

## 47 **1 Introduction**

48 Cancer is the second-highest cause of mortality in the United States, lagging just slightly behind  
49 cardiovascular disease in 2020 <sup>1</sup>. Among all cancer types, hepatocellular carcinoma (HCC) has the  
50 second-lowest 5-year survival rate (17.7%) and has shown the highest increase in mortality among all  
51 cancers over the past seven years <sup>2,3</sup>. Complicating treatment, HCC is commonly diagnosed at an  
52 intermediate or an advanced stage and often occurs secondary to underlying chronic liver disease and  
53 cirrhosis <sup>4</sup>. The prognosis is poor as treatment options are limited by compromised liver function due  
54 to underlying disease. Despite screening efforts for at-risk patients, most are not surgical candidates  
55 for partial resection, and the availability of full liver transplantation is very low relative to the need<sup>5</sup>.

56 These issues mean that systemic and localized drug-based therapies play a significant role in current  
57 standard therapy for HCC. Despite these therapeutic interventions, the survival rate for HCC remains  
58 low, partially attributed to the variable efficacy of current treatment methods based on underlying  
59 factors <sup>6-8</sup>. As such, stratifying patients for the most effective treatment is critical because of three  
60 factors; the degree of tumor burden, the degree of liver dysfunction, and highly variable treatment  
61 efficacy between patients <sup>9</sup>. For example, the tyrosine kinase inhibitor sorafenib has shown modest  
62 success in selected patients as a systemic treatment <sup>10</sup>, but effectiveness is tempered by poor tolerance  
63 of the drug in many instances<sup>9</sup>. Localized delivery of drugs through transarterial chemoembolization  
64 (TACE) combines delivery of drugs such as doxorubicin with embolization to promote localized  
65 ischemia and hypoxia. TACE blocks the arterial blood supply of a tumor through particulate or viscous  
66 liquid agents such as degradable starch microspheres, drug-eluting beads, or ethiodized oil. This is a  
67 well-established technique that allows a high local dose while simultaneously increasing the residence  
68 of chemotherapeutic drugs in the target area, cutting off the supply of nutrients, and also limiting  
69 exposure and toxicity for the rest of the body <sup>11</sup>. This has emerged as the standard of care for  
70 intermediate-stage HCC. However, tumor cells in the hypoxic environment may undergo phenotypic  
71 adaptations that aid survival. Such changes may account for the high rate of persistent, viable tumor  
72 cells observed after TACE in previous studies <sup>12</sup>. Therefore, while a substantial survival benefit can be  
73 realized, there is still much room for improvement and understanding of the changes that occur in the  
74 tumor cells during embolization<sup>6-8</sup>.

75 It is well established that many of the difficulties in treating HCC may stem from the numerous tumor  
76 microenvironment (TME) changes that occur in underlying chronic liver disease and the rapid  
77 progression of HCC. The modulation of the TME has been shown to impact drug metabolism  
78 significantly and is thought to be a major contributor to the known differential response of patients to  
79 chemotherapy <sup>13,14</sup>. Furthermore, induction of hypoxia in the TME due to stiffening of the extracellular  
80 matrix (ECM) and embolization during treatment can alter the chemoresistance of the tumor cells,  
81 further impacting the treatment efficiency in intermediate and advanced stage HCC <sup>15-17</sup>. The  
82 modulation of response and the individual impact of these TME features have yet to be fully  
83 characterized in a three-dimensional (3D) HCC-TME model.

84 The increase in microenvironmental stiffness resulting from fibrosis, usually culminating in cirrhosis,  
85 is a hallmark of most chronic liver diseases and is observed in 80-90% of HCC patients <sup>4</sup>. The most  
86 notable hallmark of liver cirrhosis that impacts cellular and tissue function is increased collagen  
87 deposition from activated hepatic stellate cells, increasing the stiffness and compression modulus of

88 liver tissue<sup>18</sup>. Similarly, the progression of HCC is marked by further localized stiffening. This  
89 desmoplastic reaction is attributed to further differentiation of liver stellate cells into myofibroblasts  
90<sup>18</sup>, resulting in additional deposition of collagen<sup>19</sup>. This stiffening of the ECM, in conjunction with high  
91 tumor cell density, further reduces local oxygen and nutrient diffusion. Limited oxygen availability has  
92 been shown to alter the outcomes of the chemotherapeutic treatments by affecting the drug transporters'  
93 p-glycoprotein (MDR1, multidrug resistance 1), drug targets (topoisomerase II), or by initiating drug-  
94 induced apoptosis<sup>20</sup>. Subsequent alterations in the cancer cells' response to chemotherapy can occur  
95 through modulation of chemoresistance markers and hepatocyte metabolic enzymes such as  
96 cytochrome P450 (CYP450), primarily the CYP3A4 subgroup<sup>21</sup>. Thus CYP3A4 expression can  
97 potentially serve as an indicator for predicting chemotherapeutic response<sup>22</sup>. This highlights a potential  
98 mechanism of differential tumor chemoresistance through the modulation of CYP3A4 under different  
99 microenvironmental conditions.

100 Numerous *in vitro* models have been used to study the impact of TME modulation on HCC  
101 treatment response. Two-dimensional (2D) cell monolayers have documented an increase in HepG2  
102 cell survival following exposure to doxorubicin during hypoxia compared to normoxic conditions<sup>23</sup>.  
103 However, traditional 2D cell culture models do not allow for adequate representation of the  
104 physiological diffusion and associated transport barriers found in the 3D extracellular  
105 microenvironment, limiting clinical translation. Tumor spheroid models have been utilized as a more  
106 representative system for assessing HCC drug response in direct cell-cell contacts and the subsequent  
107 decrease of HCC chemoresistance<sup>24</sup>. However, the lack of ECM in these models severely curtails the  
108 study of the interactions with and subsequent tuning of the ECM components of the TME<sup>25</sup>.

109 Previous efforts that address the importance of ECM microenvironmental properties on the  
110 chemotherapeutic response, employ tunable hydrogels models, composed of cells cultured in ECMs of  
111 collagen, fibrin, alginate, and Matrigel<sup>TM</sup>. These models have been used to investigate the ECM's role  
112 in *in vitro* studies of chemotherapy response, drug transport, cell invasion, and differentiation<sup>25,26</sup>.  
113 Culturing different breast cancer cell lines in an alginate hydrogel showed doxorubicin  
114 chemoresistance was altered in particular phenotypes when ECM stiffness was increased<sup>27</sup>. With  
115 respect to metabolic activity, one study investigated Ifosfamide metabolism by C3A HCC cells with  
116 different levels of CYP3A4 expression when cultured in polylactic acid (PLA)<sup>28</sup>. However, this study  
117 reported treatment efficacy only with glioblastoma cells and did not explore or discuss the treatment  
118 response of liver cells. Another study demonstrated that culturing Caco-2 colorectal cancer cells on the  
119 top of a 3D collagen-Matrigel<sup>TM</sup> blended hydrogel with dynamic flow conditions increased CYP3A4  
120 expression drastically compared to 2D monolayers without flow<sup>29</sup>. Similarly, another study showed  
121 that the CYP3A4 activity of HepaRG HCC cells increased when cells were cultured in hyaluronan-  
122 gelatin or wood-derived nanofibrillar cellulose ECMs relative to 2D monolayer culture<sup>30</sup>. Research  
123 has shown culturing U251 and U87 glioblastoma cells in 3D PLA scaffold under hypoxia exhibited  
124 higher resistance to doxorubicin and greater production of basic fibroblast growth factor (bFGF) and  
125 vascular endothelial growth factor (VEGF)<sup>31</sup>. Furthermore, U87, U251, and SNB19 glioblastoma cells  
126 have been shown to be more resistant to temozolomide when cultured in scaffold-free spheroids under  
127 hypoxic conditions compared to comparable spheroids under normoxic conditions<sup>32</sup>. Other studies  
128 have used native ECM (collagen and fibrin) and non-native polymers (agar, acrylamide, and polylactic  
129 acid) to recapitulate 3D breast and hepatic tumor microenvironments. However, these studies did not  
130 investigate the regulation of cellular metabolism, including CYP3A4 activity, under different  
131 microenvironmental conditions<sup>26,27,33,34</sup>. Recent work extending these efforts has demonstrated  
132 significant potential in utilizing collagen tunability to replicate native microenvironment properties  
133 (pH, stiffness, fiber properties, and porosity)<sup>35,36</sup>, demonstrating promise in replicating physiological  
134 TME to investigate the modulation of CYP3A4 activity and chemoresistance.

135 In this study, we utilized a collagen type I hydrogel to investigate the influence of ECM stiffness,  
136 oxygen concentration, cell type, and the availability of a 3D microenvironment (2D vs. 3D) on drug  
137 metabolism and response to two common chemotherapeutic agents, doxorubicin and sorafenib, both  
138 individually and in combination. We used four established HCC cell lines (HepG2, C3Asub28, HuH-  
139 7, and Hep3B2), which present with different basal metabolic profiles of CYP3A4 expression to  
140 quantify the impact of modulations of the TME. Our results demonstrate the importance of the  
141 contribution of a 3D ECM in drug design and dosing based on the significant differences seen in drug  
142 response and metabolism when tumor cells are cultured in 3D collagen type I compared to traditional  
143 2D culture. Further, we show that variations in the TME, including liver stiffness and hypoxia, results  
144 in altered drug metabolism and subsequent drug efficacy. Tissue stiffness, varied by using collagen  
145 concentrations comparable to normal and cirrhotic liver stiffnesses<sup>37</sup>, caused an alteration in  
146 chemoresistance and drug metabolism. TME oxygen regulation to simulate normoxic and hypoxic  
147 conditions produces a similarly significant, general effect on both chemoresistance and drug  
148 metabolism. However, the TME regulation was not consistent for every cell type investigated, shown  
149 in the heterogeneous regulation of cell chemoresistance and drug metabolism in the HCC cell lines.  
150 This highlights a potential clinically translational impact of HCC genetic polymorphisms and different  
151 etiologies on treatment outcome. Specifically, we identify that the basal cellular CYP3A4 metabolism  
152 can be differentially regulated by TME hypoxia and tissue stiffness, thus impacting the efficacy of  
153 commonly used HCC therapeutics. This relationship provides a potential explanation of the poor  
154 outcomes of drugs in HCC clinical trials and may eventually lead to improve outcomes for HCC  
155 patients.

## 156 **2 Methods**

### 157 **2.1 Cell Culture**

158 Human hepatocellular carcinoma cell lines HepG2 (HB-8065<sup>TM</sup>, ATCC<sup>®</sup>, Manassas, VA), HuH-7,  
159 Hep3B2.1.7, and HepG2 derived C3A with enhanced expression of CYP3A4 mRNA and CYP3A4-  
160 mediated activity (C3Asub28)<sup>38</sup> were used in this study. HuH-7 cells express a mutated form of tumor-  
161 suppressive protein p53, leading to an increased half-life and accumulation of the protein in cell nuclei.  
162 This has been shown to correlate with increased chemoresistance<sup>39</sup>. Hep3B2.1.7 was used as an  
163 example of an HCC tumor with hepatitis B DNA in the genome and subsequent mutations, including  
164 partially deleted and suppressed expression of p53. All cells were cultured with DMEM supplemented  
165 with 10% heat-inactivated fetal bovine serum (FBS, F4135, Sigma Aldrich, MO) and 1%  
166 Penicillin/Streptomycin (P/S, Invitrogen, CA). Normoxic conditions were similarly generated by  
167 culturing cells in standard cell culture conditions in a normoxic incubator (21% O<sub>2</sub>, 5% CO<sub>2</sub>, 37°C  
168 Thermo Fisher Scientific, Rochester, NY, USA). Hypoxic conditions were simulated by placing cells  
169 in a sealed incubator (1% O<sub>2</sub>, 5% CO<sub>2</sub>). All cells were grown to approximately 70% confluence and  
170 used within the first eight passages.

### 171 **2.2 Preparation and Tuning of Collagen**

172 Type I collagen isolated from rat tail tendons (donated by the University of Texas at Austin - Institute  
173 for Cellular and Molecular Biology) was used to recapitulate the tissue microenvironment as it is the  
174 primary ECM component of human tissue, including the liver<sup>26</sup>. As we have previously published, a  
175 stock solution of type I collagen was prepared by dissolving excised rat tail tendons in an HCl solution  
176 at a pH of 2.0 for 12 hours at 23°C<sup>26</sup>. The solution was then centrifuged at 4°C for 45 minutes at 30000  
177 g, and the supernatant was collected, lyophilized, and stored at -20°C. The lyophilized collagen was  
178 mixed with diluted 0.1% glacial acetic acid, maintained at 4°C, and vortexed every 24 hours for three  
179 days to create a collagen stock solution. Finally, collagen was centrifuged at 4°C for 10 minutes at 2700



180 rpm to remove air bubbles. Collagen concentrations of 4 and 7 mg/ml were used to replicate normal  
181 and cirrhotic liver stiffness, respectively, which we have previously demonstrated to match native liver  
182 compression moduli after cells have reached their native morphology<sup>26,37</sup>. Collagen solutions were  
183 adjusted to pH 7.4 with 1X DMEM, 10X DMEM (Sigma Aldrich, St. Louis, MO), and 1N NaOH  
184 (Fisher Scientific, Pittsburgh, PA.). Following this, the collagen mixture was mixed with the intended  
185 HCC cell lines uniformly at a concentration of  $1 \times 10^6$  cells/ml. Each suspension was dispensed as 50  
186  $\mu$ L aliquots in 96 well plates and allowed to polymerize. For 2D monolayer samples, identical numbers  
187 of cells in 100  $\mu$ L of media were dispensed into the wells of a 96 well plate. Cell media was changed  
188 every two days.

### 189 **2.3 Confined Compression Test**

190 Cirrhotic stiffening in the TME has been shown to alter the chemoresistance of many cancer cell types  
191<sup>40</sup>. As a result, the mechanical properties of the TME, such as compression modulus, also increase. The  
192 compression modulus of 3D collagen hydrogels was measured with quasi-steady uniaxial unconfined  
193 compression (Instron, Norwood, MA)<sup>26</sup> to ensure there is no significant difference between collagen  
194 gels with different HCC cell lines three days after seeding. In the analysis, the hydrogels are assumed  
195 to be linear under the deformation conditions, and the slope of the stress-strain curve represents the  
196 compression modulus. Hydrogels were prepared as described in the previous section, and 500  $\mu$ L of  
197 hydrogels were placed inside 24 well plates. Polymerized collagen samples were punched (9.53 mm  
198 diameter) to remove the concave meniscus at the sample edge. Samples were compressed using a 20  
199 mm diameter load cell of a flat steel surface. Load cells (10 N Static Load Cell, 2519-10N) were  
200 lowered approximately 2.5 mm away from the flat surface and displaced 2 mm at a rate of 0.0085 mm/s  
201 to achieve 0.1% strain/s over the range of 0-20% strain. Stress was calculated from the force response  
202 divided by the initial area of collagen sample (71.26 mm<sup>2</sup>). All measurements were performed at room  
203 temperature (23°C) and the total duration of each experiment was less than 4 minutes. The data was  
204 analyzed using Matlab<sup>®</sup> (MathWorks, Natick, MA).

### 205 **2.4 Dosing With Chemotherapeutics**

206 Doxorubicin and sorafenib have been commonly used in ongoing clinical trials for HCC treatment  
207 either alone or in combination<sup>41</sup>. Prepared samples were exposed to doxorubicin (D1515, Sigma-  
208 Aldrich, St. Louis, MO) with or without sorafenib (HY-10201, MedChemExpress LLC, Monmouth  
209 Junction, NJ,) for 24 and 48 h. A broad range (1 nM – 200 $\mu$ M) of doxorubicin concentrations were  
210 used to determine the response across the different HCC cell lines. Three different doses of sorafenib  
211 were used to replicate previously tested effective concentrations: none (0  $\mu$ M), standard (11  $\mu$ M), and  
212 high (22  $\mu$ M)<sup>42</sup>. Samples were washed with warm (37°C) 1x phosphate buffered saline (PBS) three  
213 times to remove the excess drug after the treatment. Cell culture media was used as a negative control.

214 **Measuring Viability:** Cell viability 72 hours after the completion of drug treatment was measured with  
215 Cell Titer Blue (G8081, Promega, Fitchburg, WI) cell viability assay to quantify the response of HCC  
216 cells to chemotherapeutic treatment under varying TME conditions (such as stiffness and hypoxia).  
217 Briefly, cell media was mixed at a ratio of 5:1 with assay solution and incubated at 37°C for 1 hr. A  
218 Cytation 3 plate reader was used to read fluorescence (Ex: 530 nm/Em: 620 nm) of the assay. Findings  
219 were normalized to control (cells treated with drug-free media) to obtain percent cell viability. The  
220 data gathered from cell viability assays after doxorubicin treatment was fitted using the cftool function  
221 of Matlab<sup>®</sup> (MathWorks, Natick, MA) and half-maximal inhibitory concentration (IC<sub>50</sub>) value was  
222 calculated and reported as chemoresistance indicator. As sorafenib has been used as a prodrug used for  
223 angiogenesis treatment, mainly by inhibiting vascular endothelial growth factor (VEGFR), platelet-  
224 derived growth factor receptor (PDGFR), and rapidly Accelerated Fibrosarcoma (RAF), but it also has

225 a minor direct cytotoxic side-effect in some instances<sup>15</sup>. For that reason, treatment efficacy of  
226 standalone sorafenib and combined treatments were reported as fold viability change compared to  
227 untreated control for the two clinically relevant doses used, standard (11  $\mu\text{M}$ ), and high (22  $\mu\text{M}$ ).  
228 Additionally, for combined treatment, the minimum required doxorubicin dose to initiate toxicity was  
229 reported. For this analysis, statistical comparison ( $p < 0.05$ ) of viability under the tested doses and  
230 untreated samples were compared, and the minimum dose was reported.

## 231 2.5 Modeling of Oxygen Consumption in Comsol Multiphysics

232 To verify 3D collagen gels do not induce hypoxia in the system, we modeled oxygen concentration  
233 across the culture media and collagen gel. Depletion of oxygen in collagen hydrogels by HCC cells  
234 were modeled using Comsol Multiphysics (Comsol Inc), which is a finite element analysis solver  
235 software. For this analysis, the computational domain was assumed to be 2D and axisymmetric at the  
236 center of the hydrogel and culture medium (Figure 1a). Modeling parameters are defined and parameter  
237 values are provided in Table S-I. 25000 domain elements were added to solve the problem in the  
238 computational domain. Accordingly, time dependent convective diffusion equations in transport of  
239 diluted species module were solved temporally over the collagen hydrogel (Equation 1) and culture  
240 medium (Equation 2):

$$241 \quad \epsilon_p \frac{\partial c}{\partial t} - \nabla \cdot (D_e \nabla c) = R \quad (1)$$

$$242 \quad \frac{\partial c}{\partial t} - \nabla \cdot (D_{media} \nabla c) = 0 \quad (2)$$

243 where  $c$  is the oxygen concentration,  $\epsilon_p$  is porosity of the collagen hydrogel,  $\rho$  is the density of media,  
244 heat capacity of media,  $D_e$  is effective oxygen diffusivity,  $R$  is oxygen consumption rate by HCC cells.  
245 The diffusivity of collagen hydrogels was adjusted using Bruggemen model, where the porosity of  
246 collagen hydrogels was required to be implemented. Accordingly, Equation 3 was incorporated to the  
247 computational model:

$$248 \quad D_e = \epsilon_p^{4/3} D_{collagen} \quad (3)$$

## 249 2.6 CYP3A4 Activity Measurement

250 Overexpression of CYP3A4 has been shown to decrease the efficacy of chemotherapeutics and is one  
251 of the main challenges in the treatment of HCC tumors<sup>22</sup>. To relate the chemotherapeutic response to  
252 the metabolic activity of HCC cells under the influence of hypoxia and different stiffnesses, the  
253 expression of CYP3A4 was quantified using P450-Glo™ Assay and Screening Systems (V9001,  
254 Promega, Madison, WI) in response to different oxygen concentrations, normoxic and hypoxic, and  
255 different spatial conditions, 2D, 3D normal, and 3D cirrhotic. HCC cells were cultured in 2D or 3D, as  
256 previously described for three days before CYP3A4 measurements to allow cells to reach native  
257 morphology<sup>37</sup>. Prepared samples were washed twice with PBS and incubated with 50  $\mu\text{L}$  of CYP3A4  
258 substrate Luciferin-IPA (3  $\mu\text{M}$ , dissolved in 1X DMEM). After 1 hour of incubation at 37°C, 50  $\mu\text{L}$  of  
259 Luciferin Detection Reagent was added and pipetted up and down several times to ensure cell lysis.  
260 After 20 minutes of incubation at room temperature, cell supernatants were transferred to a 96-well  
261 opaque white luminometer plate (white polystyrene; Costar, Corning Incorporated) and luminescence  
262 was measured using a Cytation 3 plate reader (BioTek Instruments, Inc., VT). Reagents without cells  
263 were included as background controls. Metabolic activities were calculated by subtracting the  
264 background luminescence and normalizing to the seeded cell number.

## 265 **2.7 Statistical Analysis**

266 Two-tailed student's t-test assuming unequal variance was performed in Matlab® (MathWorks, Natick,  
267 MA) to compare samples, and a p-value less than 0.05 was considered significant for variation. Pearson  
268 correlation between CYP3A4 expression and IC<sub>50</sub> findings was performed in Graphpad Prism  
269 (Graphpad Holdings, LLC). Data are reported as mean ± standard deviation unless otherwise indicated.  
270 All experiments were replicated a minimum of four times.

## 271 **3 Results**

272 HCC cells were cultured for three days to reach native morphology in a monolayer in a tissue culture  
273 plate (2D) or in rat tail-derived collagen type I hydrogels (3D). Cells were treated with doxorubicin  
274 with or without sorafenib for 24 or 48 hours. Viability was assessed 72 hours after the end of drug  
275 treatment, as described in Figure 2b. Before doing so, we simulated oxygen consumption in collagen  
276 hydrogels to observe whether cirrhosis alters oxygen concentration in hydrogels as presented in Figure  
277 2.

### 278 **3.1 Oxygen concentration in Collagen Hydrogels**

279 To confirm 3D collagen gels do not introduce hypoxia in the system, oxygen concentration was  
280 modeled across the gel and culture media. According to Comsol Multiphysics simulation results  
281 presented in Figure 1b, oxygen concentration slightly decreases in collagen hydrogels under normoxic  
282 culture conditions. Under normoxic culture conditions, oxygen concentration in cirrhotic collagen gel  
283 decreased to 17.15%. Oxygen concentration in normoxic culture conditions with native collagen gel  
284 resulted in 18.06%, which is slightly higher than cirrhotic conditions. The drop in oxygen concentration  
285 is a result of standardized polystyrene well plates not being gas permeable. Nevertheless, the oxygen  
286 drop compared to the initial concentration is minimal and we observe a marginal variation between  
287 native and cirrhotic hydrogels in normoxic conditions. Under hypoxic conditions, we observe depleted  
288 and uniform oxygen in hydrogels. Accordingly, we can state that oxygen concentration was uniform  
289 across the hydrogels and oxygen difference between native and cirrhotic conditions was not different  
290 (Figure 1c).

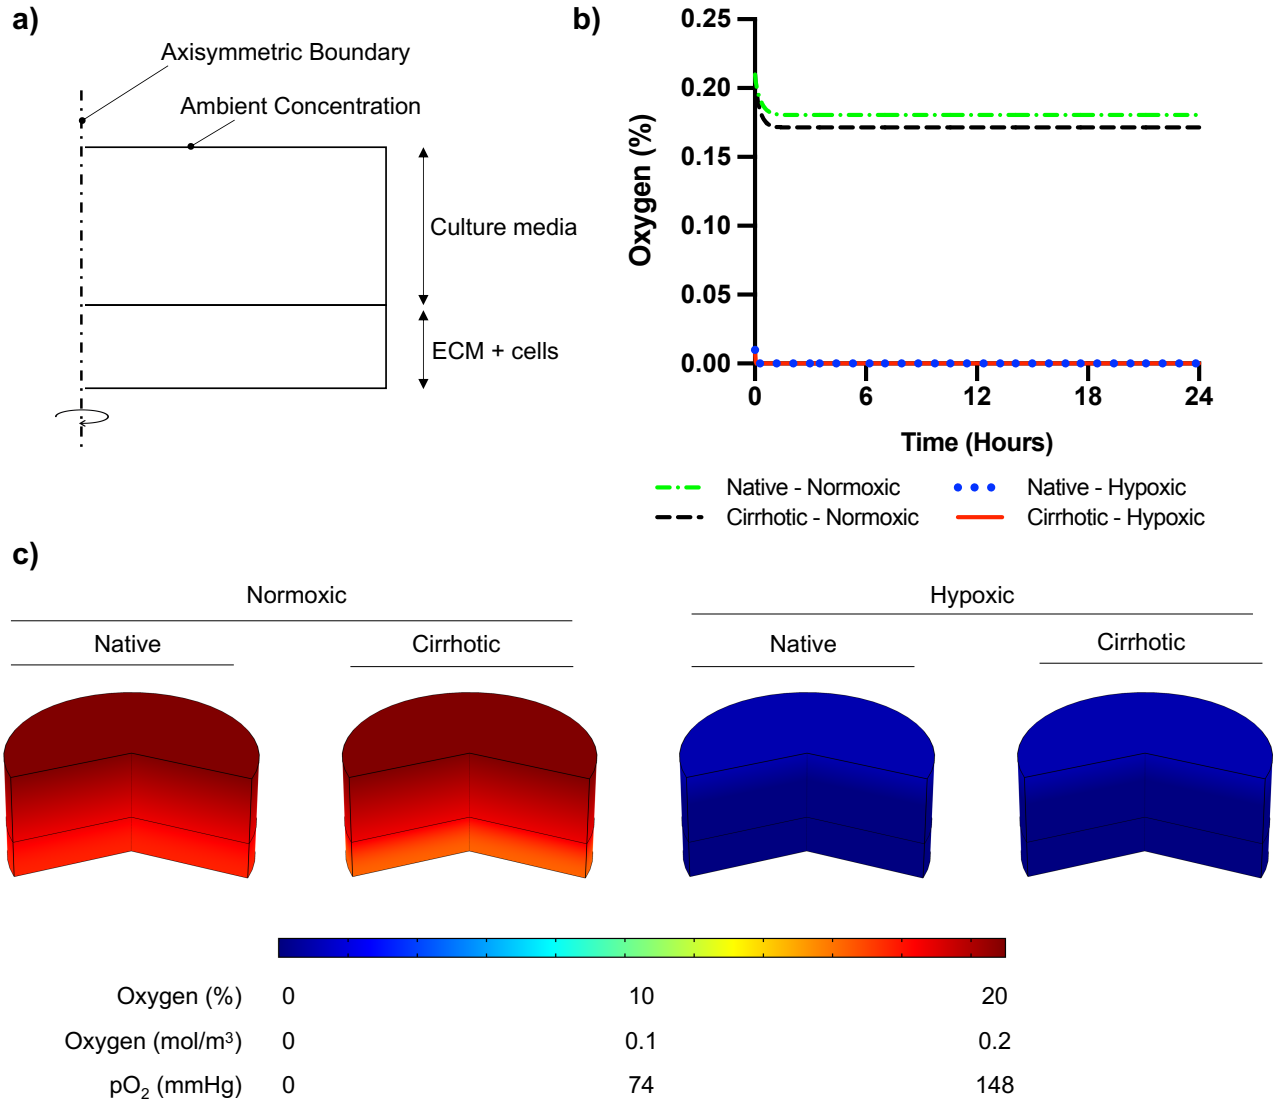

291

292 **Figure 1:** Oxygen depletion modeling in ECM and culture media. a) Computational domain of the  
 293 problem in 2D axisymmetric configuration. b) Temporal average oxygen concentration in collagen  
 294 hydrogels. Oxygen concentration distribution reaches steady state less than one hour after cell seeding.  
 295 No marginal variation was observed in oxygen concentrations between native and cirrhotic hydrogels.  
 296 c) 3D contour of oxygen concentration across the collagen hydrogel and culture media after system  
 297 reaches steady state.

298



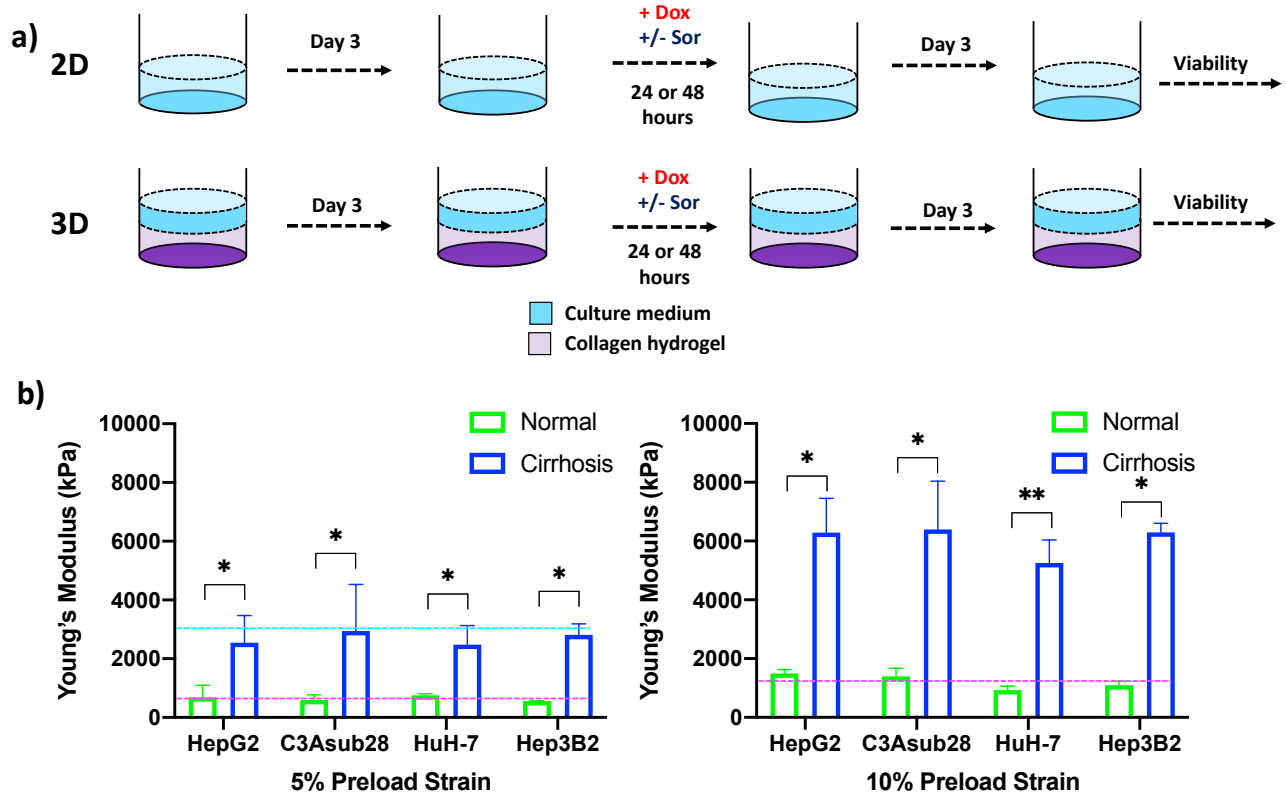

299

300 **Figure 2:** HCC cells cultured in a monolayer or in collagen hydrogels of varying stiffness. **a)**  
 301 Experimental procedure outline. Cells were allowed to adhere and reach their native morphology  
 302 before the treatment for 24 or 48 hours. **b)** Compression modulus of the HCC hydrogels with 4 and 7  
 303 mg/ml collagen concentrations, which replicate normal and cirrhotic tissues, respectively. The  
 304 compression modulus did not vary when different HCC cells were cultured in collagen hydrogels.  
 305 Compression modulus values were significantly different when different collagen concentrations were  
 306 used to replicate normal and cirrhotic conditions. Dashed lines represent patient compression modulus  
 307 of healthy (magenta) and cirrhotic (magenta) tissues.<sup>43,44</sup> Selected collagen concentrations replicated  
 308 native tissues successfully at different preload strains. \* p<0.05, \*\* p<0.01.

309

### 310 3.2 Native 3D Microenvironment Compression Modulus

311 Hepatocellular carcinoma cells uniformly embedded inside rat tail-derived collagen type I hydrogels  
 312 were allowed to reach their native morphology for three days. Afterwards, stiffness of the collagen  
 313 hydrogels was quantified using a uniaxial compression test with 5% and 10% preload strains as  
 314 presented in Figure 2b to determine any potential impact of different HCC cell lines on collagen  
 315 stiffness. Our results demonstrate that increasing collagen concentration significantly elevated the  
 316 compression modulus of the collagen gels (p<0.05). However, we found no significant difference  
 317 between compression modulus between collagen hydrogels with the different HCC cell lines over the  
 318 timeframe considered. Collagen hydrogels at 4 mg/ml concentration produce a compression modulus  
 319 comparable to tissue in a normal hepatic microenvironment, which has been reported to be at  $0.64 \pm$   
 320  $0.08$  kPa and  $1.08 \pm 0.16$  kPa for 5% and 10% preload strains, respectively<sup>43</sup>. At 4 mg/ml collagen  
 321 concentration, the average compression modulus was found to be  $0.66 \pm 0.07$  kPa and  $0.11 \pm 0.01$  kPa  
 322 for 5% and 10% preload strains, respectively. Likewise, at 7 mg/ml collagen concentration, collagen

323 hydrogels achieved a compression modulus comparable to a human hepatic tumor microenvironment,  
324 which has been reported to be 3 kPa under 5% preload strain<sup>44</sup>. The significant difference ( $p < 0.05$ ) of  
325 compression moduli between 7 mg/ml and 4 mg/ml collagen hydrogels showed we could replicate the  
326 microenvironment stiffness using these collagen properties. In our findings, using a 7 mg/ml collagen  
327 concentration, the average compression modulus was found to be  $2.70 \pm 0.22$  kPa for 5% preload strain.  
328 The reported collagen compression moduli for this study are also consistent with our previously  
329 reported collagen compression modulus values<sup>26</sup>. In the same study, we also showed that collagen  
330 concentration does not alter the diffusivity of solutes, thereby demonstrating that differential response  
331 to chemotherapy is not likely due to physical diffusion differences of the collagen concentrations<sup>26</sup>.

332

### 333 **3.3 Matrix Stiffness and Hypoxia Modulate Doxorubicin Chemoresistance in Hepatic 2D and** 334 **3D Cultures**

335 HCC cell viability in response to doxorubicin treatment under different microenvironmental conditions  
336 was measured. The resulting half-maximal inhibitory concentrations ( $IC_{50}$ ) of doxorubicin was  
337 quantified for HepG2, C3Asub28, HuH-7, and Hep3B2 cells in 2D monolayers and 3D collagen  
338 hydrogels at 4 mg/mL (3D-normal) or 7 mg/mL (3D-cirrhotic) to demonstrate the impact of the tumor  
339 structural microenvironment on the hepatic response to this drug. Furthermore, the impact of oxygen  
340 concentration was quantified through the environmental regulation of normoxic (21%  $O_2$ ) and hypoxic  
341 (1%  $O_2$ ) conditions for 2D and 3D cultures. The  $IC_{50}$  values of doxorubicin after 24-hour treatments  
342 are summarized in Figure 3.  $IC_{50}$  values for 48-hour treatment durations can be found in Fig S-I and  
343 Tables S-II and S-III as minimal changes to  $IC_{50}$  values were observed with the increased treatment  
344 duration. Overall, we demonstrated that the  $IC_{50}$  values of doxorubicin against C3Asub28 cells were  
345 the highest compared to other HCC cells, in agreeance with the sub-strain's increased drug metabolism  
346 through CYP3A4.

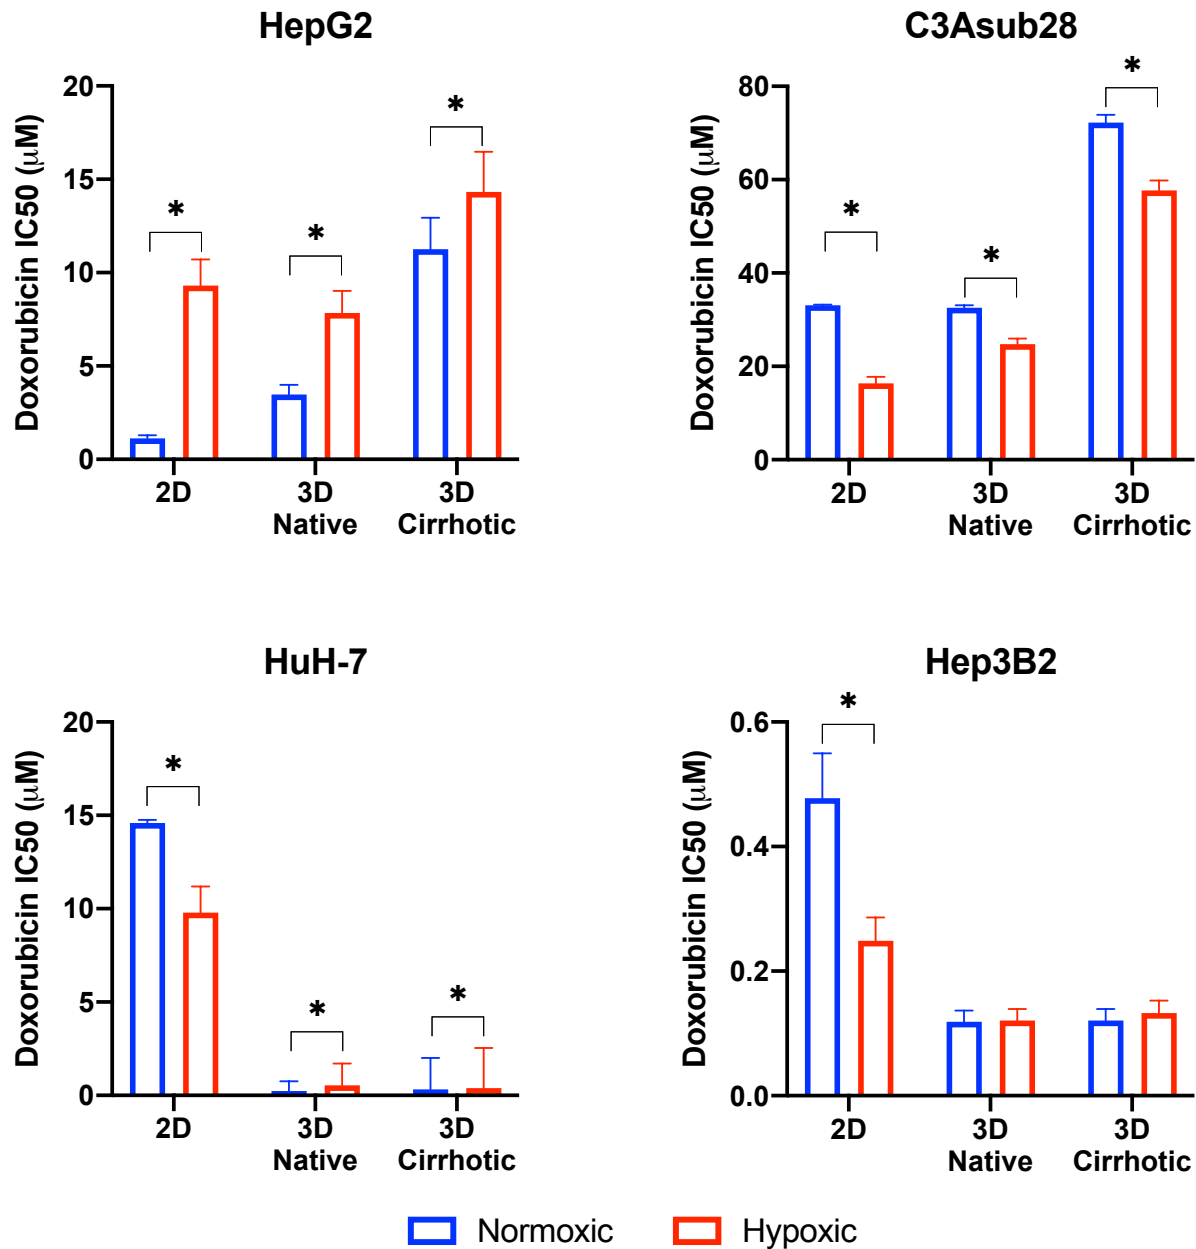

347

348 **Figure 3:** Half-maximal inhibitory concentrations (IC<sub>50</sub>) values of doxorubicin against HCC cells in  
 349 different microenvironments. HCC cells have stiffness and oxygen-dependent resistance/sensitivity to  
 350 24-hour doxorubicin treatment. Cirrhosis and hypoxia altered IC<sub>50</sub> findings differently among the HCC  
 351 cell lines. 3D-normal: 4 mg/ml collagen gel, 3D-Cirrhotic: 7 mg/ml collagen gel. Statistical  
 352 significance was compared to normoxic conditions. \*p<0.05.

### 353 3.4 Comparison of Doxorubicin IC<sub>50</sub> for 2D vs. 3D Culture under Normoxic Conditions

354 Studies have demonstrated that 3D matrix stiffness plays an important role in modulation of the cellular  
 355 response to chemotherapeutics in some cancer cell lines, providing a significantly different response  
 356 compared to standard 2D culture methods<sup>27,45</sup>. However, few groups demonstrate the variation of IC<sub>50</sub>  
 357 values of doxorubicin between standard 2D-monolayer and 3D culture under varying  
 358 microenvironmental conditions. In the context of the 3D microenvironment, we were able to determine

359 the influence of normal liver stiffness (4 mg/mL collagen) under normoxic conditions (21% O<sub>2</sub>)  
360 compared to 2D-normoxic monolayers as calculated by the fold change in chemoresistance due to the  
361 presence of the 3D microenvironment. In general, we demonstrate that IC<sub>50</sub> values of doxorubicin  
362 against HepG2 increased in 3D compared to 2D but did not change for the C3Asub28 cell line. In  
363 contrast, 3D culture decreased IC<sub>50</sub> values of doxorubicin for HuH-7 and Hep3B2 cell lines compared  
364 to 2D monolayers.

365 We observed that IC<sub>50</sub> of HepG2 cells after a 24-hour doxorubicin treatment was 3.09-fold higher in  
366 the 3D normal-normoxic environment (IC<sub>50</sub> = 1.13 μM) compared to the 2D-normoxic (IC<sub>50</sub> = 3.48  
367 μM). The IC<sub>50</sub> of doxorubicin against C3Asub28 cells was consistently the highest, but it was the only  
368 cell line that did not lead to a significant change in IC<sub>50</sub> of doxorubicin in response to the 3D normal-  
369 normoxic compared to 2D-normoxic. The efficacy of doxorubicin on HuH-7 cells cultured in 3D  
370 normal-normoxic microenvironment was higher than the HepG2 and C3Asub28 phenotypes. Overall,  
371 we observed that the IC<sub>50</sub> of doxorubicin against HuH-7 cells was lower (p<0.05) in 3D normal-  
372 normoxic compared to 2D-normoxic by 62.61-fold. Conversely, IC<sub>50</sub> values of doxorubicin against  
373 Hep3B2 cells were the lowest overall and significantly decreased 4.02-fold 3D normal-normoxic  
374 compared to 2D-normoxic.

### 375 **3.5 The Influence of Microenvironmental Stiffness on Doxorubicin Chemoresistance under** 376 **Normoxic Conditions**

377 To isolate the impact that microenvironmental stiffness plays in the regulation of chemoresistance of  
378 different HCC cell lines, we analyzed the impact that the shift from normal (4 mg/mL) to cirrhotic (7  
379 mg/mL) collagen concentration has on doxorubicin IC<sub>50</sub> values under normoxic conditions for a 24-  
380 hour treatment duration. Overall, we found that the increase in microenvironmental stiffness, modeled  
381 by the higher collagen concentration, increased the IC<sub>50</sub> values of doxorubicin against the HCC cell  
382 lines, HepG2 and C3Asub28, that had a higher basal chemoresistance to doxorubicin. Variations in  
383 fold changes for 24-hour treatment were reported in Figure S-II. 48-hour treatment duration resulted  
384 in marginal differences in IC<sub>50</sub> values compared to 24-hour treatment duration (Figure S-III). The IC<sub>50</sub>  
385 of doxorubicin against HepG2 (3.24-fold) and C3Asub28 (2.22-fold) cells cultured in 3D cirrhotic-  
386 normoxic conditions increased compared to cells cultured in 3D normal-normoxic conditions.  
387 However, for both HuH-7 and Hep3B2.17, we did not see any significant difference in IC<sub>50</sub> values of  
388 doxorubicin against these cells (p>0.05), between 3D normal-normoxic and 3D cirrhotic-normoxic  
389 conditions.

### 390 **3.6 Influence of Hypoxia on Doxorubicin Chemoresistance**

391 Oxygen concentration in HCC liver tumors can change due to reduced blood flow, increased  
392 cell density, and environmental stiffening<sup>17,23</sup>. This has been shown to alter both the proliferation rate  
393 and chemoresistance of tumor cells. We isolated and quantified the influence of hypoxia on  
394 chemoresistance, as measured by IC<sub>50</sub> values, when cells were cultured in 3D with normal liver  
395 stiffness (4 mg/ml) and in 2D monolayers both under hypoxic conditions. Overall, the introduction of  
396 hypoxic conditions to 2D monolayers or 3D collagen hydrogels with normal stiffness (4 mg/ml)  
397 showed a change in response between the HCC cell lines for 24-hour treatment durations and saw  
398 minimal changes for 48-hour treatment durations as shown in Figure S-III. Hypoxia consistently  
399 increased IC<sub>50</sub> values of doxorubicin against HepG2 cells but decreased IC<sub>50</sub> values of doxorubicin  
400 against C3Asub28 IC<sub>50</sub> compared to normoxic conditions for all stiffnesses. The response of HuH-7  
401 and Hep3B2 cells to doxorubicin under hypoxia was variable depending on if they were cultured in 2D  
402 or 3D.

403 We next isolated the impact that hypoxia plays in the regulation of chemoresistance of different HCC  
404 cell lines in 3D microenvironments. We first analyzed the effect that the shift from 4 mg/mL to 7  
405 mg/mL collagen concentration had on doxorubicin IC<sub>50</sub> values under hypoxic (1% O<sub>2</sub>) conditions and  
406 then quantified the impact that the shift from normoxia to hypoxia had within each collagen  
407 concentration. Within both normal (4 mg/mL) and cirrhotic (7 mg/mL) liver stiffness, the introduction  
408 of hypoxia resulted in a general increase in doxorubicin IC<sub>50</sub> values, except for C3Asub28 which shows  
409 the opposite trend. However, we did not observe a statistical significance of doxorubicin IC<sub>50</sub> values  
410 when Hep3B2 cells cultures in 3D normal-hypoxic or 3D cirrhotic-hypoxic conditions relative to their  
411 normoxic counterparts. All of the observed trends in IC<sub>50</sub> fold changes suggested that HCC cells,  
412 depending on the underlying phenotype (denoted by the different HCC cell lines utilized), can display  
413 a differential change in IC<sub>50</sub> values of doxorubicin dependent upon microenvironmental stiffness and  
414 oxygen availability.

### 415 **3.7 Matrix Stiffness and Hypoxia Modulate Cell Viability in Response to Sorafenib** 416 **Treatment in Hepatic 3D Cultures**

417 Sorafenib is not primarily utilized to induce direct cell death, its mechanism is to inhibit kinases  
418 responsible for promoting angiogenesis and cell growth, mainly VEGFR, PDGFR, and RAF<sup>15</sup>. As  
419 such, even high doses are not sufficient to terminate 50% of the HCC population rendering the  
420 calculation of IC<sub>50</sub> values impossible. We investigated the direct cytotoxic impact of sorafenib to  
421 establish baseline values for more clinically relevant combined therapeutic administration of sorafenib  
422 and doxorubicin. Clinically relevant standard (11 μM) and high (22 μM) doses of sorafenib reported  
423 in previous studies were tested on four different HCC cell lines<sup>42</sup>. We observed many of the same  
424 trends previously observed for doxorubicin chemoresistance (Figure 4). We note that C3Asub28  
425 demonstrated the lowest levels of cell death. We also demonstrate that in C3asub28 cells that an  
426 increase in microenvironmental stiffness correlated to a general increase in sorafenib chemoresistance.  
427 However, the effects of hypoxia were more varied, and sorafenib chemoresistance differed depending  
428 on the cell line, sorafenib dose, and microenvironmental stiffness. In our comparison of sorafenib  
429 treated cells in 3D to the untreated 3D controls, we established that cell viability is not significantly  
430 impacted at standard, 11 μM, Sorafenib doses for many of the cell lines regardless of matrix stiffness  
431 or oxygen concentration at 24-hour treatment durations. However, higher doses of sorafenib, 22 μM,  
432 shows a much higher direct cytotoxic effect across all HCC cell lines and microenvironmental  
433 conditions tested. The influence of hypoxia on sorafenib chemoresistance has a markedly different  
434 dynamic than what we have previously seen with doxorubicin.

### 435 **3.8 Sorafenib Improves Minimum Required Dose of Doxorubicin for Acute Toxicity**

436 Combined administration of doxorubicin and sorafenib in HCC patients has been commonly used due  
437 to their potential synergistic effect<sup>41,46</sup>. Doxorubicin is used to inhibit tumor proliferation<sup>47</sup>, while  
438 sorafenib is used to inhibit angiogenesis and tumor cell proliferation in the TME<sup>15</sup>. Cells cultured in  
439 3D normal and cirrhotic hydrogels were investigated for the impact of doxorubicin-sorafenib  
440 combination therapy to determine how the introduction of sorafenib influenced the resulting cell  
441 viability. Cell viability in normal and cirrhotic tissue with a 24-hour treatment duration of both drugs  
442 and the influence of hypoxia are presented in Figure 4 and changes in doxorubicin IC<sub>50</sub> values due to  
443 the presence of sorafenib discussed in this section. Treatment efficacy is reported as fold viability  
444 change compared to untreated controls reported in Figure S-IV. For this analysis, statistical comparison  
445 (p<0.05) of viability under tested doses and untreated samples were compared, and minimum dose to  
446 induce cytotoxicity was reported. We found minimal differences between 24- and 48-hour treatments  
447 with these drugs and present 48-hour treatment results in Figure S-V.



448 HepG2 cells treated with sorafenib combination therapy demonstrated a general decrease in  
449 doxorubicin IC<sub>50</sub>. Under 3D normal-normoxic conditions, the doxorubicin IC<sub>50</sub> values decreased from  
450 3.48 μM to 0.68 μM (p=0.01) and 0.02 μM (p=0.005) for combination therapy with standard and high  
451 doses of sorafenib, respectively. Similarly, 3D cirrhotic-normoxic conditions with sorafenib  
452 combination therapy reduced the doxorubicin IC<sub>50</sub> from 11.25 μM to 2.42 μM (p=0.04) and 0.92 μM  
453 (p=0.02) for standard and high doses of sorafenib, respectively. Under hypoxic conditions, we found  
454 that the trend held. HepG2 cells in the normal-hypoxic conditions in combination therapy showed  
455 decreased doxorubicin IC<sub>50</sub> values from 7.85 μM to 0.71 μM (p=0.03) and 0.31 μM (p=0.01) for  
456 combination therapy with standard and high doses of sorafenib, respectively. Under cirrhotic-hypoxic  
457 conditions, combination therapy with sorafenib reduced doxorubicin IC<sub>50</sub> values from 14.33 μM to 2.9  
458 μM (p=0.05) and 2.85 μM (p=0.05) for combination therapy with standard and high doses of sorafenib,  
459 respectively. Although the HepG2 cells showed a higher chemoresistance to doxorubicin in hypoxic  
460 and cirrhotic culture conditions relative to normoxic and normal, the combination with sorafenib  
461 significantly diminished doxorubicin IC<sub>50</sub> values for all conditions tested.

462 The C3Asub28 cell line demonstrated the highest levels of chemoresistance out of all of the selected  
463 HCC cell lines, however consistent with other cell lines, combination therapy with sorafenib  
464 considerably reduced doxorubicin IC<sub>50</sub> values for all conditions. Under 3D normal-normoxic  
465 conditions, the doxorubicin IC<sub>50</sub> values decreased from 32.58 μM to 9.81 μM (p=0.04) and 8.36 μM  
466 (p=0.006) for combination therapy with standard and high doses of sorafenib, respectively. Similarly,  
467 3D cirrhotic-normoxic conditions with sorafenib combination therapy reduced the doxorubicin IC<sub>50</sub>  
468 from 72.23 μM to 22.25 μM (p=0.05) and 9.46 μM (p=0.02) for standard and high doses of sorafenib,  
469 respectively. Under the normal-hypoxic condition, cells in combination therapy showed decreased  
470 doxorubicin IC<sub>50</sub> values from 24.76 μM to 3.99 μM (p=0.05) and 3.66 μM (p=0.04) for standard and  
471 high doses of sorafenib, respectively. Under cirrhotic-hypoxic conditions, combination therapy with  
472 sorafenib reduced doxorubicin IC<sub>50</sub> values from 57.68 μM to 4.48 μM (p=0.05) and 3.78 μM (p=0.05)  
473 for combination therapy with standard and high doses of sorafenib, respectively.

474 HuH-7 cells under the normal-normoxic condition showed a decrease in doxorubicin IC<sub>50</sub> values from  
475 0.43 μM to 0.33 μM and 0.01 μM (p=0.009) for combination therapy with standard and high doses of  
476 sorafenib, respectively. Similarly, 3D cirrhotic-normoxic conditions with sorafenib combination  
477 therapy reduced the doxorubicin IC<sub>50</sub> from 2.24 μM to 1.61 μM and 0.31 μM (p=0.03) for standard and  
478 high doses of sorafenib, respectively. Under hypoxic conditions, we found that HuH-7 cells in the  
479 normal-hypoxic conditions showed decreased doxorubicin IC<sub>50</sub> values from 0.54 μM to 0.24 μM  
480 (p=0.05) and 0.02 μM (p=0.005) for combination therapy with standard and high doses of sorafenib,  
481 respectively. Under cirrhotic-hypoxic conditions, combination therapy with sorafenib reduced  
482 doxorubicin IC<sub>50</sub> values from 0.4 μM to 0.25 μM (p=0.05) and 0.01 μM (p=0.008) for combination  
483 therapy with standard and high doses of sorafenib, respectively.

484 For Hep3B2 cells, high doses of sorafenib (22 μM) were sufficient to reduce cell viability below 50%  
485 without the addition of doxorubicin in all conditions tested. However, combination therapy with  
486 standard doses of sorafenib (11 μM) reduced doxorubicin IC<sub>50</sub> values in all conditions tested. Under  
487 3D normal-normoxic conditions, the doxorubicin IC<sub>50</sub> values decreased from 0.12 μM to 0.1 μM for  
488 combination therapy with standard doses of sorafenib. Similarly, 3D cirrhotic-normoxic conditions  
489 with sorafenib combination therapy reduced the doxorubicin IC<sub>50</sub> from 0.3 μM to 0.14 μM (p=)  
490 standard doses of sorafenib. Under the normal-hypoxic conditions, combination therapy showed  
491 decreased doxorubicin IC<sub>50</sub> values from 0.12 μM to 0.04 μM (p=0.01) for combination therapy with  
492 standard doses of sorafenib. Under cirrhotic-hypoxic conditions, combination therapy with sorafenib

493 reduced doxorubicin IC<sub>50</sub> values from 0.13 μM to 0.04 μM (p=0.02) for standard doses of sorafenib.

**Normoxic**

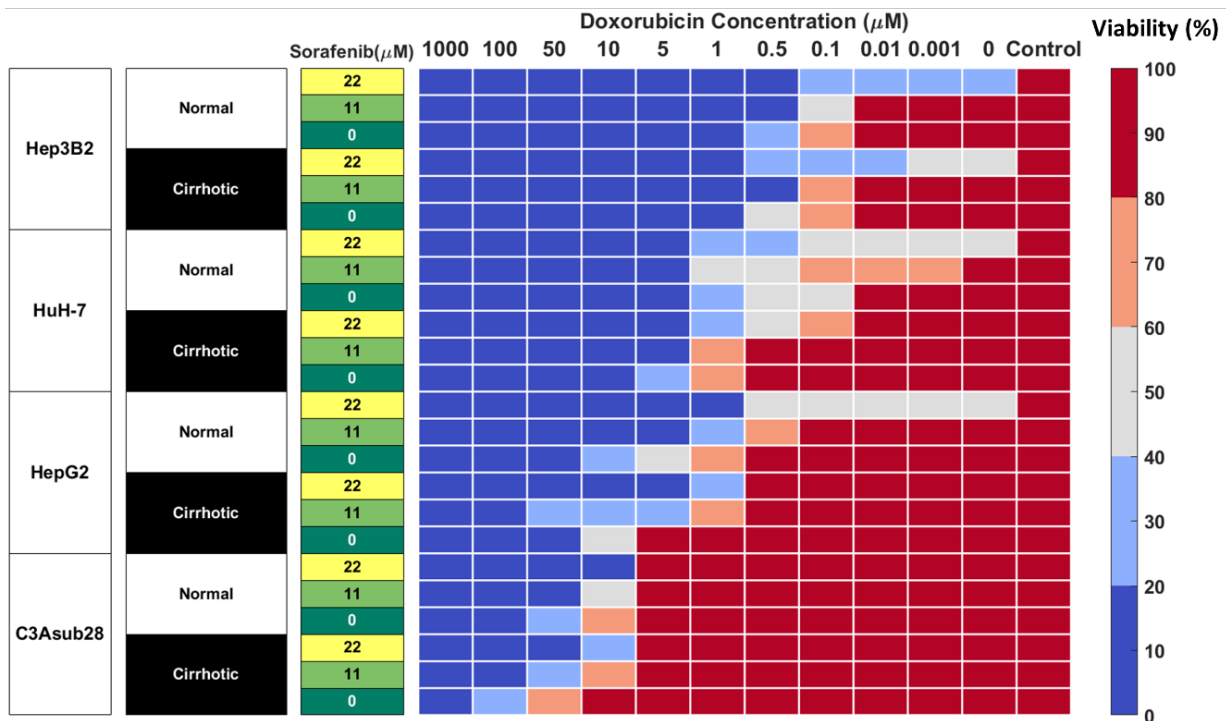

**Hypoxic**

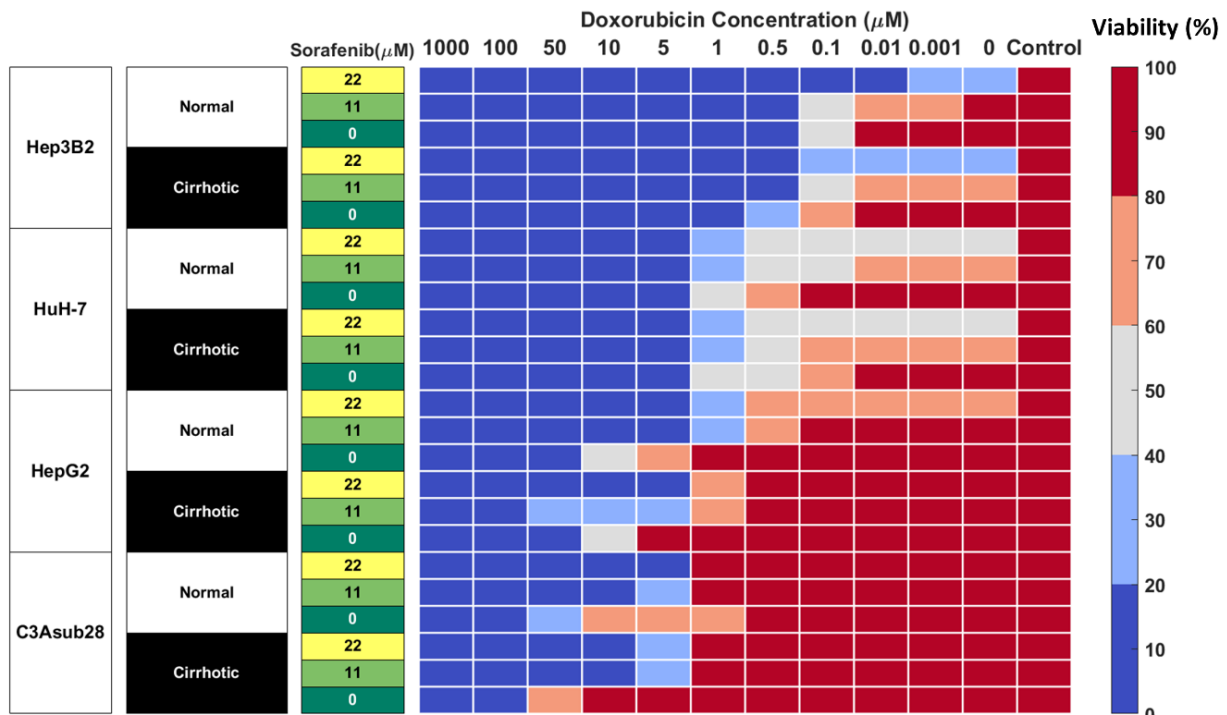

494

495 **Figure 4:** Combined doxorubicin and sorafenib treatment efficacy of HCC cell lines under the  
 496 influence of hypoxia and cirrhosis. HCC cell types show sensitivity to combined sorafenib and  
 497 doxorubicin treatment for 24 hours. Cells cultured in 3D normal and cirrhotic hydrogels in hypoxic  
 498 and normoxic conditions. Cell viability was analyzed and plotted as a percentage of the untreated

499 control. A combination of doxorubicin with sorafenib improves treatment efficacy. The influence of  
500 cirrhosis decreased HCC cell death.

### 501 3.9 Cirrhosis and Hypoxia Regulated HCC Metabolic Activity

502 The CYP3A4 enzyme is one of the major mechanisms of drug metabolism for cancer therapeutics,  
503 including sorafenib and doxorubicin, in the liver. These enzymes can metabolize drugs before they  
504 have the chance to cause their intended direct cytotoxic effects on the cells.<sup>14</sup> CYP3A4 metabolic  
505 activity of the HCC cell lines was measured in 2D monolayers and in 3D collagen I hydrogels in  
506 response to different stiffness and hypoxic conditions. Regulation of CYP3A4 by cirrhosis and hypoxia  
507 is presented in Figure 5. In agreement with the previously published literature, the C3Asub28 cell line  
508 expressed much higher CYP3A4 expression than other HCC cell lines<sup>38</sup>. In our study, C3Asub28  
509 CYP3A4 expression is  $7.17 \pm 2.73$  fold higher than the HepG2 cell line, which is within the range of  
510 previously published work ( $6.1 \pm 0.2$  fold)<sup>38</sup>. The introduction of hypoxia significantly downregulated  
511 CYP3A4 expression compared to normoxia in all microenvironments ( $p=0.03$ ). CYP3A4 expression  
512 of C3Asub28 cells did not change with culture in 3D normal-normoxic and 3D normal-hypoxic  
513 conditions than similar 2D conditions ( $p=0.78$ ).

514 On the other hand, 3D cirrhotic-normoxic and cirrhotic-hypoxic culture upregulated CYP3A4  
515 expression by 1.50 ( $p=0.007$ ) and 1.65 ( $p=0.01$ ) fold compared to 3D normal-normoxic and normal-  
516 hypoxic conditions, respectively. HepG2 cell lines expressed significantly lower ( $p=0.02$ ) CYP3A4  
517 expression compared to the C3Asub28 cell line. However, unlike the C3Asub28 cell line, hypoxia  
518 upregulated CYP3A4 expression in HepG2 cell lines compared to normoxia for both 2D and 3D  
519 microenvironments ( $p=0.04$ ). 3D normal-normoxic and normal-hypoxic culture upregulated CYP3A4  
520 expression compared to 2D normoxic and 2D hypoxic culture by 1.90 ( $p=0.03$ ) and 1.35 ( $p=0.003$ )  
521 fold, respectively. Similarly, 3D cirrhotic-normoxic and cirrhotic-hypoxic culture upregulated  
522 CYP3A4 expression compared to 3D normal-normoxic and normal-hypoxic stiffness by 2.13  
523 ( $p=0.004$ ) and 2.00 ( $p=0.0002$ ) fold, respectively. HuH-7 cells expressed relatively lower values of  
524 CYP3A4, and none was detected in 3D culture conditions. Furthermore, the Hep3B2 cell line did not  
525 express any CYP3A4 expression in all culture conditions. These results show that HCC cells express  
526 different basal levels of CYP3A4 and that this expression is can be directly regulated by TME oxygen  
527 concentration and stiffness.

528 Lastly, Pearson correlation between measured CYP3A4 expression and doxorubicin  $IC_{50}$  findings with  
529 or without the influence of sorafenib was analyzed and presented in Figure 6. Accordingly, we  
530 observed a strong correlation between CYP3A4 metabolite and  $IC_{50}$  findings for HepG2, C3Asub28,  
531 and Hep3B2 cell lines. However, this correlation was not observed for HuH-7 cell line. In this study,  
532 we found only HepG2 and C3Asub28 cell lines were regularly expressing CYP3A4 expression in 3D  
533 culture conditions unlike to HuH-7 and Hep3B2. For that reason, only HepG2 and C3Asub28 cell lines'  
534 CYP3A4 expression regulation should be taken into account in alternation of  $IC_{50}$  values. For that  
535 reason, we should conclude that HepG2 and C3Asub28 cell lines are more appropriate for the  
536 investigation of CYP3A4 expression regulation.

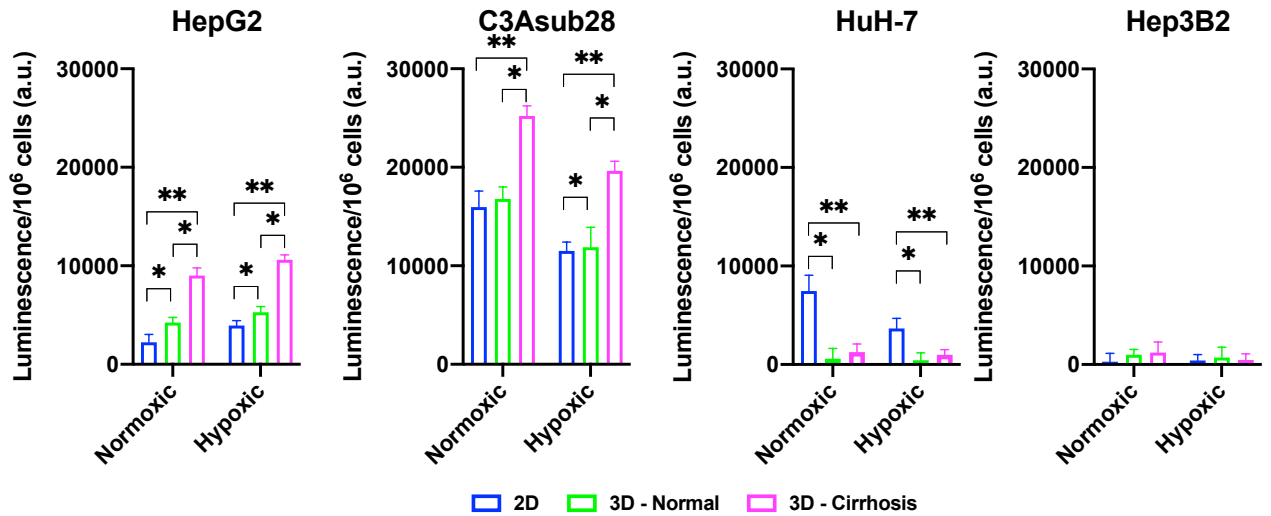

537

538 **Figure 5:** Regulation of CYP3A4 is responsible for drug metabolism by HCC cell lines in response  
 539 to hypoxic and cirrhotic conditions. Presence of cirrhosis and hypoxia altered CYP3A4 activity  
 540 differently between HCC cell lines. Data represented as mean ± standard deviation. \* denotes  
 541 significance for cirrhotic and normal 3D samples compared to the 2D monolayer. \* p < 0.05, \*\* p <  
 542 0.01.

### Doxorubicin IC<sub>50</sub> - CYP3A4 Correlation

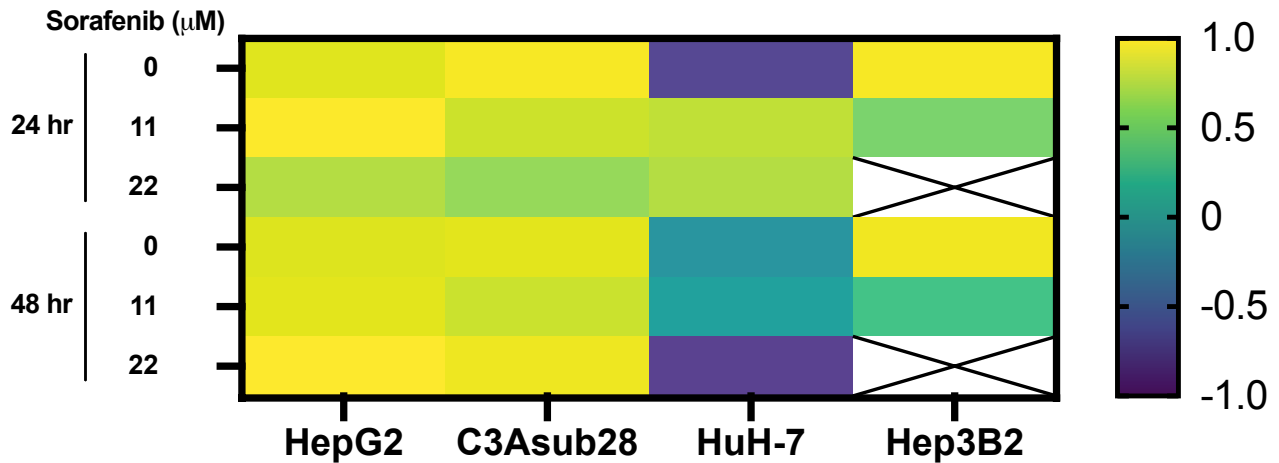

543

544

545 **Figure 6:** Pearson correlation between CYP3A4 expression and doxorubicin IC<sub>50</sub> findings with and  
 546 without the influence of sorafenib treatment in 3D culture conditions. Strong correlation was observed  
 547 in CYP3A4 expressing HepG2 and C3Asub28 cells unlike to HuH-7 and Hep3B2. Array cells with  
 548 cross represent IC<sub>50</sub> values were not detected within tested doses.

549

550 **4 Discussion**

551 In this study, we establish that chemoresistance can be regulated by hypoxic and cirrhotic conditions  
552 in the TME through direct modulation of CYP3A4 expression. This regulation can differentially alter  
553 the efficacy of chemotherapeutic drugs in HCC cell lines, which potentially has clinical translation to  
554 patient-specific HCC treatments. We examined the direct impact of TME stiffness and oxygen  
555 concentration, variables commonly associated with HCC tumors on cellular response to  
556 chemotherapeutics. This impact was measured by determining the difference in cell viability in  
557 response to chemotherapeutic treatment and regulation of the expression of the primary drug-  
558 metabolizing enzyme CYP3A4. Using a collagen-based hydrogel system, we observed that 3D culture  
559 alone significantly modulates resistance to doxorubicin and sorafenib in HepG2, C3Asub28, and HuH-  
560 7 cells but not for Hep3B2 cells. This stiffness-dependent resistance was not observed in similar  
561 Hep3B2 cultures, which warrants further investigation into potential phenotypic and genotypic  
562 differences in this specific cell line that might elucidate this response. This differential regulation of  
563 chemoresistance in different cell lines of the same cancer type is not unique to HCC. This phenomenon  
564 has also been observed in other cancers: The chemoresistance indicator, ethoxyresorufin, was  
565 upregulated in 3D culture conditions compared to 2D culture in the C3A cell line. This is in agreement  
566 with HepG2 and C3Asub28 doxorubicin treatment findings<sup>48</sup>. Equivalently, the IC<sub>50</sub> of C3A cells after  
567 treatment with paracetamol, trovafloxacin, and fialuridine were found to be higher in 2D culture  
568 conditions compared to 3D culture conditions. This result corresponds with our HuH-7 and Hep3B2  
569 doxorubicin chemoresistance findings<sup>24</sup>. Overall, these studies suggest that drug efficacy in 2D vs. 3D  
570 conditions depends on cell phenotype and drug type. This coincides with our findings in which HepG2  
571 and C3Asub28 cell lines had greater chemoresistance in 3D culture compared to 2D but showed the  
572 converse trend for HuH-7 and Hep3B2 cells.

573 Cirrhosis and desmoplastic stiffening in the TME has been shown to be potential factors regulating  
574 drug chemoresistance<sup>49</sup>. In our study, HepG2 chemoresistance to sorafenib and doxorubicin increased  
575 in response to cirrhotic stiffness relative to their culture in a matrix of normal stiffness. The C3Asub28  
576 cell line demonstrated a higher chemoresistance to doxorubicin in response to cirrhotic conditions than  
577 other tested HCC cells. Similar to the HepG2 cell line, a rise in stiffness also increased the  
578 chemoresistance to doxorubicin of the C3Asub28 cell line. However, sorafenib alone did not alter the  
579 cell viability of the C3Asub28 cell line for the considered doses potentially attributed to the cell line's  
580 high baseline CYP3A4 metabolic activity. The resistance of HuH-7 and Hep3B2 cells to doxorubicin  
581 was not altered in response to cirrhosis, whereas CYP3A4 expression of these cell lines did not change  
582 in response to cirrhosis. However, the same cell lines were shown to have higher chemoresistance to  
583 sorafenib in response to cirrhosis. Although CYP3A4 carries out the majority of metabolic activity in  
584 hepatocytes, other minor cytochromes, such as CYP1A2, 2A6, 1A2, and 2C9, exist and may also alter  
585 the drug chemoresistance to an as yet unknown extent. The additional CYP expression present in HCC  
586 cells may be responsible for the differential effect of cirrhosis on chemoresistance differences between  
587 sorafenib and doxorubicin<sup>50</sup>. Furthermore, studies in literature showed that a rise in stiffness does not  
588 always increase the chemoresistance of cancer cells<sup>49</sup>. The increase in TME stiffness may improve  
589 IC<sub>50</sub> of MDA-MB-231 triple-negative breast cancer cells to doxorubicin<sup>27</sup>. However, the same study  
590 showed that MCF-7 HER2+ breast cancer cells did not show a stiffness-dependent resistance to  
591 doxorubicin. This study hypothesized the increase of stiffness altered chemoresistance differently  
592 because MCF-7 remained in an epithelial phenotype, but MDA-MB-231 had a mesenchymal  
593 phenotype. Similarly, stiffness induces chemoresistance of BxPC-3 and Suit2-007 pancreatic cancer  
594 cells to paclitaxel, but not to gemcitabine<sup>51</sup>. These studies hypothesized the differential effect of  
595 chemoresistance to different drugs between cell lines could be related to phenotypical differentiation  
596 from epithelial to mesenchymal phenotype. In addition, HepG2, HuH-7, and Hep3B2 cell lines have  
597 different phenotypic profiles and differentiation levels, potentially explaining differences in their  
598 chemoresistance and metabolic activity in response to cirrhosis<sup>52</sup>.



599 Hypoxia is known to be one of the regulating factors of chemoresistance<sup>53</sup>. In our study, HepG2  
600 chemoresistance to doxorubicin and sorafenib increased in response to hypoxia compared to the  
601 normoxic condition as measured both by increased IC<sub>50</sub> values and CYP3A4 expression. However, for  
602 C3Asub28 and HuH-7, chemoresistance decreased in response to hypoxia compared to normoxia.  
603 Previous studies have also demonstrated the differential effect of hypoxia on drug efficacy, depending  
604 on the cell line and phenotype. The presence of hypoxia has been shown to upregulate hypoxia-induced  
605 factor (HIF1- $\alpha$ ), but this alters the CYP isoforms differently in various medulloblastoma cell lines<sup>54</sup>.  
606 The molecular pathway still could not be explained in this study, but it has been hypothesized that  
607 nuclear receptors, namely PPAR $\alpha$ , PPAR $\gamma$ , or ER- $\alpha$ , as well as the constitutive androstane and  
608 pregnane X receptors, have found to be altered differently under hypoxia<sup>54</sup>. In addition to this,  
609 chemoresistance does not always increase in response to hypoxia<sup>53</sup>. The same study also showed the  
610 regulation of chemoresistance under hypoxia is not universal between ovarian, renal, breast, lung, and  
611 lymphoma cancer cell lines and varies for different drugs. This supports our data showing the  
612 differential effects of hypoxia on doxorubicin IC<sub>50</sub> values of the tested HCC cell lines<sup>53</sup>. Also, hypoxia  
613 increases HepG2 chemoresistance to doxorubicin, in confirmation with our study, but not to rapamycin  
614<sup>23</sup>. In parallel to this, a significant decrease in apoptotic cells induced by cisplatin was reported under  
615 hypoxic conditions for HepG2 and MHCC97L cell lines, which is in agreement with what we observed  
616 with increased chemoresistance of HepG2 cells under hypoxic conditions<sup>55</sup>. It has also been showed  
617 that hypoxia downregulates drug-metabolizing enzymes and subsequently the chemoresistance of the  
618 HepaRG hepatoma cell line, which agrees with our findings of C3Asub28 CYP3A4 modulation under  
619 hypoxia<sup>56</sup>.

620 Consequently, the differential role of hypoxia on molecular chemoresistance expressions and drug  
621 efficacy has been reported. It has been shown that HIF1- $\alpha$  is upregulated due to a lack of oxygen in  
622 TME. This may or may not induce drug transporters such as MDR1 and targets of delivered drugs  
623 (topoisomerase II) in each cell line<sup>20</sup>. Additionally, possible nuclear receptors have been proposed to  
624 regulate CYP3A4 in response to hypoxia through the expression of HIF1- $\alpha$  and p53 expression<sup>57</sup>.  
625 Alternation of molecular drug transport mechanisms could be the reason why we observed variable  
626 chemoresistance between different HCC cell lines under hypoxia.

627 Our study showed CYP3A4 expression is regulated by microenvironment stiffness and hypoxia for  
628 HepG2, C3Asub28, and HuH-7 cell lines providing a potential mechanism connecting the TME to the  
629 chemotherapeutic response. The regulation of CYP3A4 resulted in a significant impact on the efficacy  
630 of doxorubicin and sorafenib, whose trends in the regulation mirror the observed changes in cell  
631 viability in response to the drugs. Doxorubicin IC<sub>50</sub> was higher, and sorafenib terminated less HCC  
632 population for HepG2 and C3Asub28 cells in cirrhotic, 7 mg/ml, microenvironments in general  
633 compared to healthy, 4 mg/mL, stiffness reflecting the CYP3A4 expression in those  
634 microenvironments. However, we did not see any significant IC<sub>50</sub> change in response to doxorubicin  
635 for the HuH-7 cell line when cultured in normal and cirrhotic 3D microenvironments. In addition,  
636 CYP3A4 expression of Hep3B2 did not change when cultured in normal and cirrhotic 3D  
637 microenvironments, which is parallel with IC<sub>50</sub> findings.

638 Moreover, in general, we demonstrate that hypoxia increases doxorubicin IC<sub>50</sub> against HepG2 cells but  
639 not for C3Asub28 cells. The change of doxorubicin IC<sub>50</sub> was parallel to the regulation of CYP3A4  
640 expression. Hypoxia upregulated CYP3A4 expression of HepG2 cells but downregulated CYP3A4  
641 expression of C3Asub28 cells. This work further confirms the upregulated metabolic expression of  
642 CYP3A4 decreases doxorubicin efficacy in confirmation with previous studies across multiple cancer  
643 types, including liver<sup>58</sup>, colorectal<sup>29</sup>, breast<sup>59</sup>, and prostate<sup>60</sup>. Inhibition of CYP3A4 activity of human  
644 primary hepatocytes has shown to suppress human pregnane X receptor (hPXR) agonist-induced

645 chemoresistance<sup>61</sup>. Overexpression of CYP3A4 in tumor tissues and chemoresistance to therapeutics  
646 has been shown in clinical practices<sup>62</sup>. Similarly, there is evidence that therapeutic efficacy of drugs  
647 have been diminished through CYP3A4 enzyme expressed by hepatocellular carcinoma cells<sup>63</sup>. These  
648 studies agree with our findings on the regulation of chemoresistance based on CYP3A4 activity.  
649 However, our work presents the significant finding that the regulation of CYP3A4 expression can be  
650 directly tied to the tumor microenvironment. We demonstrate that CYP3A4 activity can be regulated  
651 by oxygen concentration and TME stiffness, subsequently altering the metabolism of the  
652 chemotherapeutic drugs in HCC cell lines. Possible nuclear receptor pathways regulating CYP3A4 in  
653 response to hypoxia through HIF1- $\alpha$ , p53, PPAR $\alpha$ , VDR, FXR, and LXR have been proposed and  
654 hypothesized that hypoxia could affect CYP3A4 at different degrees<sup>57</sup>. Furthermore, TME stiffness  
655 has been hypothesized to alter CYP3A4 differentially through yes-associated protein (YAP) pathway  
656<sup>64</sup>. This likely has a direct clinical translation to *in vivo* HCC regulation enforced by the clinical  
657 observations of highly variable patient to patient HCC CYP3A4 expression<sup>65</sup>. The majority of the  
658 current HCC treatments result in poor treatment outcomes, as such, the consideration of tumor  
659 microenvironment properties (such as stiffness variation due to the changing fibrosis scores of patients,  
660 presence of different levels of hypoxia as a result of this desmoplastic stiffening in the TME), and CYP  
661 expression levels could potentially bring benefits to outcomes of HCC treatment, and provide a basis  
662 for personalized HCC treatment<sup>62,66</sup>.

663 Overall, this work demonstrates TME stiffness and oxygen concentration modulates CYP3A4  
664 expression of HCC cells and, consequently, their chemoresistance to doxorubicin and sorafenib  
665 treatment. We determined the existence of a stiffness-dependent resistance to doxorubicin and  
666 sorafenib, depending on the differential genetics of the HCC, such as phenotypical changes from  
667 epithelial to mesenchymal<sup>27</sup>. HepG2 and C3Asub28 cells showed a higher chemoresistance to  
668 doxorubicin and sorafenib under cirrhotic conditions. Conversely, we did not observe a change in  
669 chemoresistance for HuH-7 and Hep3B2 cell lines to doxorubicin in response to cirrhotic conditions,  
670 which may be due to underlying genotypic differences including differentiation levels, which alter  
671 metabolism pathways through glucose, glutamine, and glutamate<sup>52</sup>. Hypoxia demonstrated a much  
672 different impact on the HCC cells, upregulating the chemoresistance of HepG2 and HuH-7, but  
673 downregulating chemoresistance of the C3Asub28 cell line. We did not observe a significant variation  
674 of chemoresistance in the Hep3B2 cell line in 3D culture. Drug metabolism, measured by CYP3A4  
675 expression, mirrored effective chemoresistance measured by IC<sub>50</sub> values in cell vitality assays. We saw  
676 an increase in CYP3A4 expression in the 3D culture of C3Asub28 and HepG2 cell lines compared to  
677 2D, but this expression decreased for the HuH-7 cell line for both hypoxic and normoxic conditions.  
678 At a minimum, the presence of a 3D culture system significantly modulates the response of HCC to  
679 chemotherapy over the standard 2D methods. Previously it has been shown 3D culture alters the  
680 integrin ligands (such as AKT and RAF), which are the targeting for doxorubicin and sorafenib,  
681 differently among different cell lines compared to 2D culture<sup>49</sup>.

682 Further, the stiffness of the microenvironment, seen in HCC patients with cirrhosis, modulates drug  
683 resistance and should be taken into consideration when determining treatment options and doses. While  
684 CYP3A4 maintains the majority of the drug metabolism in the liver, other enzymes such as CYP2A6,  
685 1A2, and 2C9 has shown to have a minor contribution to drug metabolism<sup>62</sup>, and provide further  
686 insight in IC<sub>50</sub> of Hep3B2 variation we observed between 2D and 3D microenvironments but not  
687 captured a difference in CYP3A4 expression. Further expansion of this work is needed to investigate  
688 the varied response between existing HCC lines or patient-specific primary tumor cells that might  
689 provide insight into the known differential effectiveness of standard HCC treatments *in vivo*<sup>66</sup>.  
690 Potentially, other drugs used to treat HCC in clinical practice such as lenvatinib could be tested in this  
691 system to observed its potential effect on HCC treatment<sup>67</sup>.

692 HCC is diagnosed based on imaging and laboratory criteria, making it the only cancer that is diagnosed  
693 without biopsy. This practice has come under increasing scrutiny for many reasons, especially given  
694 the growing appreciation of the value of precision medicine. Moreover, while some progress has been  
695 made, HCC still responds very poorly to drugs in general and notably to immunotherapies. The results  
696 from the present study underscore the importance of restoring the practice of obtaining biopsy  
697 specimens to obtain the necessary information. Despite much effort to identify characteristic  
698 biomarkers (both serum and newer methods of elastography), important gaps remain. An  
699 understanding of the degree of fibrosis, baseline expression of CYP3A4, and the immune landscape  
700 will become essential in developing drug treatment plans and clinical trials.

### 701 **5 Acknowledgment**

702 The authors would like to thank Dr. Wei Li (Department of Mechanical Engineering, the University of  
703 Texas at Austin) and Dr. Christopher Sullivan (Department of Molecular Sciences) for generously  
704 gifting C3Asub28 cells and HuH-7, respectively. This work was completed with support from the  
705 Veterans Health Administration and with resources and the use of facilities at the Central Texas  
706 Veterans Health Care System, Temple, Texas. The contents do not represent the views of the U.S.  
707 Department of Veterans Affairs or the United States Government. T.E.Y. is a CPRIT scholar in cancer  
708 research.

### 709 **6 Funding**

710 The authors acknowledge the support of the Cancer Prevention Research Institute of Texas (CPRIT)  
711 for funding part of this work through grants RR160005, National Cancer Institutes for funding through  
712 R21EB019646, R01CA186193, R01CA201127-01A1, U24CA226110 and U01CA174706, National  
713 Institute of Diabetes and Digestive and Kidney Diseases funding through awards R01DK082435 and  
714 R01DK112803 and Department of Veterans Affairs Biomedical Laboratory Research and  
715 Development Service funding through award BX003486.

### 716 **7 Author contributions**

717 Conceptualization: A.O. and M.N.R. conceived of the idea for the study. Supervision: E.N.K.C, T.E.Y.  
718 and M.N.R. supervised the project. E.N.K.C., S.D., M.M., T.E.Y. and M.N.R provided feedback and  
719 assistance with manuscript preparation. Investigation: A.O., D.L.S., and M.N.R were responsible for  
720 performing the studies and analyzing the experimental data. Writing: A.O. wrote the initial draft of the  
721 paper. All authors discussed the results and revised the manuscript.

### 722 **8 References**

- 723 1. Grandhi MS, Kim AK, Ronnekleiv-Kelly SM, Kamel IR, Ghasebeh MA, Pawlik TM.  
724 Hepatocellular carcinoma: From diagnosis to treatment. *Surg Oncol.* 2016;25(2):74-85.  
725 doi:10.1016/j.suronc.2016.03.002
- 726 2. Petrick JL, Kelly SP, Altekruse SF, McGlynn KA, Rosenberg PS. Future of hepatocellular  
727 carcinoma incidence in the United States forecast through 2030. *J Clin Oncol.*  
728 2016;34(15):1787-1794. doi:10.1200/JCO.2015.64.7412
- 729 3. Siegel RL, Miller KD, Jemal A. Cancer Statistics, 2018. *CA CANCER J CLIN.* 2018;68(1):7-  
730 30. doi:10.3322/caac.21387

- 731 4. Davis GL, Dempster J, Meler JD, et al. *Hepatocellular Carcinoma: Management of an*  
732 *Increasingly Common Problem*. Vol 21.; 2008. doi:10.1080/08998280.2008.11928410
- 733 5. Marrero JA, Kulik LM, Sirlin CB, et al. Diagnosis, Staging, and Management of Hepatocellular  
734 Carcinoma: 2018 Practice Guidance by the American Association for the Study of Liver  
735 Diseases. *Hepatology*. 2018;68(2):723-750. doi:10.1002/hep.29913
- 736 6. Abou-Alfa GK, Niedzwieski D, Knox JJ, et al. Phase III randomized study of sorafenib plus  
737 doxorubicin versus sorafenib in patients with advanced hepatocellular carcinoma (HCC):  
738 CALGB 80802. *J Clin Oncol*. 2016;34:192-192. doi:10.1200/jco.2016.34.4\_suppl.192
- 739 7. Grazie LM. et al. Chemotherapy for hepatocellular carcinoma: The present and the future, *World*  
740 *J Hepatol*. 2017;9(21):9-21.
- 741 8. Lohitesh K, Chowdhury R, Mukherjee S. Resistance a major hindrance to chemotherapy in  
742 hepatocellular carcinoma: An insight. *Cancer Cell Int*. 2018;18(1):44. doi:10.1186/s12935-018-  
743 0538-7
- 744 9. LU L-C, CHEN P-J, YEH Y-C, et al. Prescription Patterns of Sorafenib and Outcomes of  
745 Patients with Advanced Hepatocellular Carcinoma: A National Population Study. *Anticancer*  
746 *Res*. 2017;37(5):2593-2599. doi:10.21873/anticancer.11604
- 747 10. Llovet JM, Ricci S, Mazzaferro V, et al. Sorafenib in advanced hepatocellular carcinoma. *N*  
748 *Engl J Med*. 2008;359(4):378-390. doi:10.1056/NEJMoa0708857
- 749 11. Schicho A, Hellerbrand C, Krüger K, et al. Impact of Different Embolic Agents for Transarterial  
750 Chemoembolization (TACE) Procedures on Systemic Vascular Endothelial Growth Factor  
751 (VEGF) Levels. *J Clin Transl Hepatol*. 2016;4(4):288-292. doi:10.14218/jcth.2016.00058
- 752 12. Marin HL, Furth EE, Olthoff K, Shaked A, Soulen MC. Histopathologic outcome of neoadjuvant  
753 image-guided therapy of hepatocellular carcinoma. *J Gastrointest Liver Dis*. 2009;18(2):169-  
754 176. Accessed June 11, 2019.
- 755 13. De Montellano PRO. Cytochrome P450-activated prodrugs. *Future Med Chem*. 2013;5(2):213-  
756 228. doi:10.4155/fmc.12.197
- 757 14. Rodriguez-Antona C, Ingelman-Sundberg M. Cytochrome P450 pharmacogenetics and cancer.  
758 *Oncogene*. 2006;25(11):1679-1691. doi:10.1038/sj.onc.1209377
- 759 15. Keating GM, Santoro A. *Sorafenib: A Review of Its Use in Advanced Hepatocellular*  
760 *Carcinoma*. Vol 69.; 2009. doi:10.2165/00003495-200969020-00006
- 761 16. Xu W, Zhang X, Yu J, et al. Targeting the vasculature in hepatocellular carcinoma treatment:  
762 Starving versus normalizing blood supply. *Clin Transl Gastroenterol*. 2017;8(6):e98.  
763 doi:10.1038/ctg.2017.28
- 764 17. Lencioni R, Petruzzi P, Crocetti L. Chemoembolization of hepatocellular carcinoma. *Semin*  
765 *Intervent Radiol*. 2013;30(1):3-11. doi:10.1055/s-0033-1333648
- 766 18. Koyama Y, Brenner DA. Liver inflammation and fibrosis. *J Clin Invest*. 2017;127(1):55-64.

- 767 doi:10.1172/JCI88881
- 768 19. Affo S, Yu L-X, Schwabe RF. The Role of Cancer-Associated Fibroblasts and Fibrosis in Liver  
769 Cancer. *Annu Rev Pathol Mech Dis.* 2016;12(1):153-186. doi:10.1146/annurev-pathol-052016-  
770 100322
- 771 20. Doktorova H, Hrabeta J, Khalil MA, Eckschlager T. Hypoxia-induced chemoresistance in  
772 cancer cells: The role of not only HIF-1. *Biomed Pap.* 2015;159(2):166-177.  
773 doi:10.5507/bp.2015.025
- 774 21. Beckwitt CH, Clark AM, Wheeler S, et al. Liver ‘organ on a chip.’ *Exp Cell Res.*  
775 2018;363(1):15-25. doi:10.1016/j.yexcr.2017.12.023
- 776 22. Rodríguez-Antona C, Leskelä S, Zajac M, et al. Expression of CYP3A4 as a predictor of  
777 response to chemotherapy in peripheral T-cell lymphomas. *Blood.* 2007;110(9):3345-3351.  
778 doi:10.1182/blood-2007-02-075036
- 779 23. Bowyer C, Lewis AL, Lloyd AW, Phillips GJ, MacFarlane WM. Hypoxia as a target for drug  
780 combination therapy of liver cancer. *Anticancer Drugs.* 2017;28(7):771-780.  
781 doi:10.1097/CAD.0000000000000516
- 782 24. Webb SD, Colley HE, Sharma P, Murdoch C, Gaskell H, Williams DP. Characterization of a  
783 functional C3A liver spheroid model. *Toxicol Res.* 2016;5(4):1053-1065.  
784 doi:10.1039/c6tx00101g
- 785 25. Khawar IA, Park JK, Jung ES, Lee MA, Chang S, Kuh HJ. Three Dimensional Mixed-Cell  
786 Spheroids Mimic Stroma-Mediated Chemoresistance and Invasive Migration in hepatocellular  
787 carcinoma. *Neoplasia.* 2018;20(8):800-812. doi:10.1016/j.neo.2018.05.008
- 788 26. Antoine EE, Vlachos PP, Rylander MN. Tunable collagen I hydrogels for engineered  
789 physiological tissue micro-environments. *PLoS One.* 2015;10(3).  
790 doi:10.1371/journal.pone.0122500
- 791 27. Brock A, Joyce MH, Suggs LJ, et al. Phenotypic Basis for Matrix Stiffness-Dependent  
792 Chemoresistance of Breast Cancer Cells to Doxorubicin. *Front Oncol.* 2018;8:337.  
793 doi:10.3389/fonc.2018.00337
- 794 28. Ma L, Barker J, Zhou C, et al. Towards personalized medicine with a three-dimensional micro-  
795 scale perfusion-based two-chamber tissue model system. *Biomaterials.* 2012;33(17):4353-4361.  
796 doi:10.1016/j.biomaterials.2012.02.054
- 797 29. Kim HJ, Ingber DE. Gut-on-a-Chip microenvironment induces human intestinal cells to undergo  
798 villus differentiation. *Integr Biol.* 2013;5(9):1130-1140. doi:10.1039/c3ib40126j
- 799 30. Malinen MM, Kanninen LK, Corlu A, et al. Differentiation of liver progenitor cell line to  
800 functional organotypic cultures in 3D nanofibrillar cellulose and hyaluronan-gelatin hydrogels.  
801 *Biomaterials.* 2014;35(19):5110-5121. doi:10.1016/j.biomaterials.2014.03.020
- 802 31. Kim JW, Ho WJ, Wu BM. *The Role of the 3D Environment in Hypoxia-Induced Drug and*  
803 *Apoptosis Resistance.* Vol 31.; 2011.



- 804 32. Musah-Eroje A, Watson S. A novel 3D in vitro model of glioblastoma reveals resistance to  
805 temozolomide which was potentiated by hypoxia. *J Neurooncol.* 2019;142(2):231-240.  
806 doi:10.1007/s11060-019-03107-0
- 807 33. Adriani G, Pavesi A, Kamm RD. Studying TCR T cell anti-tumor activity in a microfluidic  
808 intrahepatic tumor model. In: *Methods in Cell Biology.* Vol 146. ; 2018:199-214.  
809 doi:10.1016/bs.mcb.2018.05.009
- 810 34. Ahn J, Ahn J, Yoon S, Nam YS, Son M, Oh J. Human three-dimensional in vitro model of  
811 hepatic zonation to predict zonal hepatotoxicity. *J Biol Eng.* 2019;5:1-15. doi:10.1186/s13036-  
812 019-0148-5
- 813 35. Özkan A, Stolley D, Cressman ENK, et al. The Influence of Chronic Liver Diseases on Hepatic  
814 Vasculature: A Liver-on-a-chip Review. *Micromachines.* 2020;11(5):487.  
815 doi:10.3390/mi11050487
- 816 36. Stolley DL, Crouch AC, Özkan A, et al. Combining chemistry and engineering for  
817 hepatocellular carcinoma: Nano-scale and smaller therapies. *Pharmaceutics.* 2020;12(12):1-18.  
818 doi:10.3390/pharmaceutics12121243
- 819 37. Ozkan A, Ghouseifam N, Hoopes PJ, Yankeelov TE, Rylander MN. In vitro vascularized liver  
820 and tumor tissue microenvironments on a chip for dynamic determination of nanoparticle  
821 transport and toxicity. *Biotechnol Bioeng.* 2019;116(5):1201-1219. doi:10.1002/bit.26919
- 822 38. Küblbeck J, Reinisalo M, Mustonen R, Honkakoski P. Up-regulation of CYP expression in  
823 hepatoma cells stably transfected by chimeric nuclear receptors. *Eur J Pharm Sci.*  
824 2010;40(4):263-272. doi:10.1016/j.ejps.2010.03.022
- 825 39. Hientz K, Mohr A, Bhakta-Guha D, Efferth T. *The Role of P53 in Cancer Drug Resistance and*  
826 *Targeted Chemotherapy.* Vol 8.; 2017. doi:10.18632/oncotarget.13475
- 827 40. Godugu C, Patel AR, Desai U, Andey T, Sams A, Singh M. Alginate Matrix™ Based 3D Cell Culture  
828 System as an In-Vitro Tumor Model for Anticancer Studies. *PLoS One.* 2013;8(1).  
829 doi:10.1371/journal.pone.0053708
- 830 41. Abou-Alfa GK, Shi Q, Knox JJ, et al. Assessment of Treatment with Sorafenib Plus Doxorubicin  
831 vs Sorafenib Alone in Patients with Advanced Hepatocellular Carcinoma: Phase 3 CALGB  
832 80802 Randomized Clinical Trial. *JAMA Oncol.* 2019;5(11):1582-1588.  
833 doi:10.1001/jamaoncol.2019.2792
- 834 42. Coriat R, Nicco C, Chéreau C, et al. Sorafenib-induced hepatocellular carcinoma cell death  
835 depends on reactive oxygen species production in vitro and in vivo. *Mol Cancer Ther.*  
836 2012;11(10):2284-2293. doi:10.1158/1535-7163.MCT-12-0093
- 837 43. Hey-Chi Hsu, Wen-Chun Yeh, Pei-Ming Yang, et al. Young's modulus measurements of human  
838 liver and correlation with pathological findings. In: *2001 IEEE Ultrasonics Symposium.*  
839 *Proceedings. An International Symposium (Cat. No.01CH37263).* Vol 2. IEEE; 2002:1233-  
840 1236. doi:10.1109/ultsym.2001.991942
- 841 44. Yeh WC, Li PC, Jeng YM, et al. Elastic modulus measurements of human liver and correlation

- 842 with pathology. *Ultrasound Med Biol.* 2002;28(4):467-474. doi:10.1016/S0301-  
843 5629(02)00489-1
- 844 45. Ozcelikkale A, Shin K, Noe-Kim V, et al. Differential response to doxorubicin in breast cancer  
845 subtypes simulated by a microfluidic tumor model. *J Control Release.* 2017;266:129-139.  
846 doi:10.1016/j.jconrel.2017.09.024
- 847 46. Merle P, Blanc JF, Phelip JM, et al. Doxorubicin-loaded nanoparticles for patients with  
848 advanced hepatocellular carcinoma after sorafenib treatment failure (RELIVE): a phase 3  
849 randomised controlled trial. *Lancet Gastroenterol Hepatol.* 2019;4(6):454-465.  
850 doi:10.1016/S2468-1253(19)30040-8
- 851 47. Cox J, Weinman S. Mechanisms of doxorubicin resistance in hepatocellular carcinoma. *Hepatic*  
852 *Oncol.* 2015;3(1):57-59. doi:10.2217/hep.15.41
- 853 48. Amitay-Shaprut S, Cohen S, Elkayam T, Dvir-Ginzberg M, Harel T. Enhancing the Drug  
854 Metabolism Activities of C3A— A Human Hepatocyte Cell Line—By Tissue Engineering  
855 Within Alginate Scaffolds. *Tissue Eng.* 2006;12(5):1357-1368. doi:10.1089/ten.2006.12.1357
- 856 49. Shin JW, Mooney DJ. Extracellular matrix stiffness causes systematic variations in proliferation  
857 and chemosensitivity in myeloid leukemias. *Proc Natl Acad Sci U S A.* 2016;113(43):12126-  
858 12131. doi:10.1073/pnas.1611338113
- 859 50. Ashida R, Okamura Y, Ohshima K, et al. CYP3A4 Gene Is a Novel Biomarker for Predicting a  
860 Poor Prognosis in Hepatocellular Carcinoma. *Cancer Genomics Proteomics.* 2017;14(6):445-  
861 453. doi:10.21873/cgp.20054
- 862 51. Rice AJ, Cortes E, Lachowski D, et al. Matrix stiffness induces epithelial-mesenchymal  
863 transition and promotes chemoresistance in pancreatic cancer cells. *Oncogenesis.*  
864 2017;6(7):352. doi:10.1038/oncsis.2017.54
- 865 52. Nwosu ZC, Battello N, Rothley M, et al. Liver cancer cell lines distinctly mimic the metabolic  
866 gene expression pattern of the corresponding human tumours. *J Exp Clin Cancer Res.*  
867 2018;37(1). doi:10.1186/s13046-018-0872-6
- 868 53. Strese S, Fryknäs M, Larsson R, Gullbo J. *Effects of Hypoxia on Human Cancer Cell Line*  
869 *Chemosensitivity.* Vol 13.; 2013. doi:10.1186/1471-2407-13-331
- 870 54. Valencia-Cervantes J, Huerta-Yepe S, Aquino-Jarquín G, et al. Hypoxia increases  
871 chemoresistance in human medulloblastoma DAOY cells via hypoxia-inducible factor 1 $\alpha$ -  
872 mediated downregulation of the CYP2B6, CYP3A4 and CYP3A5 enzymes and inhibition of  
873 cell proliferation. *Oncol Rep.* 2019;41(1):178-190. doi:10.3892/or.2018.6790
- 874 55. Chi KL, Zhen FY, Ho DW, et al. An Akt/hypoxia-inducible factor-1 $\alpha$ /platelet-derived growth  
875 factor-BB autocrine loop mediates hypoxia-induced chemoresistance in liver cancer cells and  
876 tumorigenic hepatic progenitor cells. *Clin Cancer Res.* 2009;15(10):3462-3471.  
877 doi:10.1158/1078-0432.CCR-08-2127
- 878 56. Boudjema K, Ishida S, Hori T, et al. Drug-metabolising enzymes are down-regulated by hypoxia  
879 in differentiated human hepatoma HepaRG cells: HIF-1 $\alpha$  involvement in CYP3A4 repression.

- 880 *Eur J Cancer*. 2009;45(16):2882-2892. doi:10.1016/j.ejca.2009.07.010
- 881 57. Yuan X, Lu H, Zhao A, Ding Y, Min Q, Wang R. Transcriptional regulation of CYP3A4 by  
882 nuclear receptors in human hepatocytes under hypoxia. *Drug Metab Rev*. 2020;0(0):1-10.  
883 doi:10.1080/03602532.2020.1733004
- 884 58. Zhou F, Lu L, Peng X, et al. Sorafenib Metabolism Is Significantly Altered in the Liver Tumor  
885 Tissue of Hepatocellular Carcinoma Patient. *PLoS One*. 2014;9(5):e96664.  
886 doi:10.1371/journal.pone.0096664
- 887 59. Breslin S, O'Driscoll L. *The Relevance of Using 3D Cell Cultures, in Addition to 2D Monolayer*  
888 *Cultures, When Evaluating Breast Cancer Drug Sensitivity and Resistance*. Vol 7.; 2016.  
889 doi:10.18632/oncotarget.9935
- 890 60. Chen TC, Sakaki T, Yamamoto K, Kittaka A. The roles of cytochrome P450 enzymes in prostate  
891 cancer development and treatment. *Anticancer Res*. 2012;32:291-298.
- 892 61. Abbott KL, Chaudhury CS, Chandran A, et al. Belinostat, at its clinically relevant  
893 concentrations, inhibits rifampicin-induced CYP3A4 and MDR1 gene expressions. *Mol*  
894 *Pharmacol*. 2019;95(3):324-334. doi:10.1124/mol.118.114587
- 895 62. Molina-Ortiz D, Camacho-Carranza R, González-Zamora JF, et al. Differential expression of  
896 Cytochrome P450 enzymes in normal and tumor tissues from childhood rhabdomyosarcoma.  
897 *PLoS One*. 2014;9(4). doi:10.1371/journal.pone.0093261
- 898 63. Hu DG, Mackenzie PI, Lu L, Meech R, McKinnon RA. Induction of human UDP-  
899 Glucuronosyltransferase 2B7 gene expression by cytotoxic anticancer drugs in liver cancer  
900 HepG2 Cells. *Drug Metab Dispos*. 2015;43(5):660-668. doi:10.1124/dmd.114.062380
- 901 64. Speer JE, Wang Y, Fallon JK, Smith PC, Allbritton NL. Evaluation of human primary intestinal  
902 monolayers for drug metabolizing capabilities. *J Biol Eng*. 2019;13(1). doi:10.1186/s13036-  
903 019-0212-1
- 904 65. Yan T, Lu L, Xie C, et al. Severely impaired and dysregulated cytochrome P450 expression and  
905 activities in hepatocellular carcinoma: Implications for personalized treatment in patients. *Mol*  
906 *Cancer Ther*. 2015;14(12):2874-2886. doi:10.1158/1535-7163.MCT-15-0274
- 907 66. Rodríguez-Perálvarez M, Luong TV, Andreana L, Meyer T, Dhillon AP, Burroughs AK. A  
908 systematic review of microvascular invasion in hepatocellular carcinoma: Diagnostic and  
909 prognostic variability. *Ann Surg Oncol*. 2013;20(1):325-339. doi:10.1245/s10434-012-2513-1
- 910 67. Chang Lee R, Tebbutt N. Systemic treatment of advanced hepatocellular cancer: new hope on  
911 the horizon. *Expert Rev Anticancer Ther*. 2019;19(4):343-353.  
912 doi:10.1080/14737140.2019.1585245
- 913
